1 **A cellular stress response induced by the CRISPR/dCas9 activation system is not**  
2 **heritable through cell divisions.**

3 Andrew D. Johnston<sup>1</sup> (andrew.johnston@med.einstein.yu.edu)

4 Alali Abdulrazak<sup>1</sup> (Abdulrazak.k.Alali@gmail.com)

5 Hanae Sato<sup>1</sup> (hanae.sato@einstein.yu.edu)

6 Shahina B. Maqbool<sup>1</sup> (shahina.maqbool@einstein.yu.edu)

7 Masako Suzuki<sup>1</sup> (masako.suzuki@einstein.yu.edu)

8 John M. Greally<sup>1</sup> (john.greally@einstein.yu.edu)

9 Claudia A. Simões-Pires<sup>1,2\*</sup> (claudia.avello@unige.ch)

10

11 <sup>1</sup>Center for Epigenomics and Department of Genetics, Albert Einstein College of Medicine,  
12 Bronx, NY, 10461, USA. Tel: +1 718 678 1234.

13 <sup>2</sup>School of Pharmaceutical Sciences, University of Geneva, CH-1211 Geneva 4, Switzerland.  
14 Tel: +41 22 379 6028.

15

16 Running title: CRISPR -triggered cellular stress response

17

18 Keywords : CRISPR, guide RNA, VP16, stress response genes, cell division

19

20 \*Corresponding author

21 **Authorship confirmation statement**

22

23 Project design: C.A.S.-P.. Project oversight: M.S., J.M.G and C.A.S.-P. Experimental design:  
24 A.D.J., C.A.S.-P., M.S., and J.M.G. Experiment execution: A.D.J., H.S., A.A, S.B.M. and  
25 C.A.S.-P. Data analysis: A.D.J. and C.A.S.-P. Manuscript preparation: A.D.J. and C.A.S.-P.  
26 Manuscript editing and finalization: A.D.J., A.A., H.S., S.B.M., M.S., J.M.G. and C.A.S.-P.  
27 This manuscript has been uploaded to bioRxiv. It is currently under submission.  
28

29 **Author disclosure statement**

30

31 No competing financial interests exist.

32 **ABSTRACT**

33 The CRISPR/Cas9 system can be modified to perform 'epigenetic editing' by utilizing the  
34 catalytically-inactive (dead) Cas9 (dCas9) to recruit regulatory proteins to specific genomic  
35 locations. In prior studies, epigenetic editing with multimers of the transactivator VP16 and  
36 guide RNAs (gRNAs) was found to cause adverse cellular responses. These side effects may  
37 confound studies inducing new cellular properties, especially if the cellular responses are  
38 maintained through cell divisions - an epigenetic regulatory property. Here we show how  
39 distinct components of this CRISPR/dCas9 activation system, particularly untargeted gRNAs,  
40 upregulate genes associated with transcriptional stress, defense response, and regulation of  
41 cell death. Our results highlight a previously undetected acute stress response to  
42 CRISPR/dCas9 components in human cells, which is transient and not maintained through  
43 cell divisions.

## 44 INTRODUCTION

45 The prokaryotic clustered regularly interspaced short palindromic repeats (CRISPR) system  
46 has been extensively used for eukaryotic genome editing, allowing precise point mutations,  
47 insertions and deletions, as well as epigenetic editing.<sup>1-3</sup> Tempering the the promise of  
48 CRISPR/Cas9 systems is the concern of off-target effects. The Cas9 nuclease protein has  
49 been shown to bind promiscuously across the genome,<sup>4</sup> resulting in undesirable insertion-  
50 deletion events as a consequence of this off-target cleavage.<sup>5</sup>

51 Epigenetic editing uses dCas9 (dead Cas9), a mutated Cas9 devoid of endonuclease activity,  
52 allowing the recruitment of effector proteins to specific loci without causing mutations at those  
53 sites. Over time, different CRISPR activation (epigenetic editing) systems have been  
54 proposed and compared in regards to their efficacy and off-target effects.<sup>6</sup> The first constructs  
55 consisted of the standard activator VP64 (four copies of VP16) linked to the C-terminus of  
56 dCas9.<sup>7,8</sup> VP16 is a viral protein that forms a transcriptional regulatory complex in host cells  
57 to induce early gene transcription upon herpes simplex infection.<sup>9</sup> Subsequent CRISPR  
58 activation systems have been developed, many of them expressing VP16 repeats (VP64 or  
59 VP160), either fused to dCas9<sup>7, 10-13</sup> or recruited by protein tagging and programmable RNA  
60 scaffolds.<sup>14, 15</sup> Off-target activation has not been detected using CRISPR activation,  
61 suggesting that guide RNA (gRNA) sequences are not inducing off-target recruitment of dCas9  
62 leading to gene activation. However, a prior study points to a possible side effect of epigenetic  
63 editing using VP64 that involves the downregulation of the Interleukin 32 gene (*IL32*).<sup>7</sup>  
64 Moreover, when produced via *in vitro* transcription, CRISPR gRNAs triggered side effects  
65 related to the innate immune response in human cells, with the upregulation of genes involved  
66 in the type I interferon response.<sup>16, 17</sup>

67 Given these potential side effects of epigenetic editing, we aimed to investigate the genome-  
68 wide, off-target effects of the CRISPR components on human transcriptional regulation. Here  
69 we examined the gene expression effects of distinct components of a VP16-based  
70 CRISPR/dCas9 activation system, by analyzing cells transiently transfected with different

71 combinations of dCas9, gRNAs and VP16 repeats, applying normalized transfected DNA  
72 amounts, and selection of positively transfected cells. This strategy allowed us to characterize  
73 a previously undetected acute stress response to the CRISPR/dCas9 components in human  
74 cells.

75

## 76 **MATERIAL AND METHODS**

### 77 **Plasmid construction**

78 To generate the dCas9 vectors, plasmid pAC154-dual-dCas9VP160-sgExpression (Addgene  
79 plasmid # 48240)<sup>18</sup> was linearized to introduce the 2A-GFP sequence downstream to the  
80 dCas9-VP160 fusion. Reverse complement oligonucleotides were annealed and amplified to  
81 generate the 2A sequence. The GFP sequence was amplified by PCR from plasmid pBI-  
82 MCS-EGFP (Addgene plasmid #16542)<sup>19</sup> and all fragments were Gibson assembled to  
83 provide the sgRNA-dCas9-VP160-2A-GFP vector. Additional steps of plasmid digestion, gel  
84 purification, and Gibson assembly were then applied to the resulting vector. In this way,  
85 distinct CRISPR components were sequentially removed to generate the vectors sgRNA-  
86 dCas9-2A-GFP and sgRNA-2A-GFP.

87 A gRNA cloning vector (Addgene plasmid #41824) was used as the gRNA empty backbone  
88 and for cloning the gRNA sequences as previously described.<sup>20</sup> The vector was linearized,  
89 then reverse complement oligonucleotides containing the 19-nucleotide gRNA target  
90 sequence and the gRNA scaffold were annealed and Gibson assembled into the vector to  
91 generate individual gRNAs1-6. The gRNA sequences (**Supplementary Table 1**) were  
92 selected as those with the highest scores and shortest distance to the TSS using the CRISPR  
93 design tool [crispr.mit.edu](http://crispr.mit.edu). Plasmid sequences are provided in **Supplementary File 1**.

94

### 95 **Cell culture, transfection, and sorting**

96 HEK 293T cells were cultured in DMEM medium, supplemented with 10% fetal bovine serum  
97 (FBS, Benchmarck), 100 units/mL penicillin, and 100  $\mu$ g/mL streptomycin (Life Technologies).  
98 Cells were cultured in 75 cm<sup>2</sup> tissue culture flasks (NUNC, Thermo Scientific) at 37°C in a 5%  
99 CO<sub>2</sub> incubator. For each condition, a total of 10<sup>6</sup> cells/100 mm dish was cultured in triplicate  
100 overnight, then transfected with 1.93 pmol of GFP-expressing vectors and 3.47 pmol of gRNA  
101 vectors (**Supplementary Table 2**). Control cells received transfection reagents only.  
102 Transfections were conducted with Lipofectamine 2000 (Invitrogen) according to the  
103 manufacturer's instructions. After 24 h following transfection, the medium was replaced and  
104 cells were kept under culture for a total time of 48 h after transfection. Subsequently, cells  
105 were detached with EDTA, pelleted, washed twice, and resuspended in FACS buffer (Hank's  
106 balanced salt solution buffer supplemented with 1% BSA and 0.5 mM EDTA). Cell  
107 suspensions were then submitted to cell analysis and sorting in a FACS Aria II cytometer (BD  
108 Biosciences). FACS data were analyzed using FACSDiva software (Becton Dickinson) with  
109 gating of single cells using FSC/W and SSC/W, and gating of GFP+ cells. When subsequent  
110 analyses were to be performed, cells were sorted into culture medium, washed twice with  
111 PBS, and pelleted.

112

### 113 **CD34 FACS analysis**

114 Cells were detached with EDTA, washed twice, and suspended in FACS buffer at 5 x 10<sup>5</sup>  
115 cells/mL. For each sample, three aliquots of 100  $\mu$ L were prepared to be treated with CD34  
116 PE monoclonal antibody (clone 4H11, eBioscience), isotype control PE Mouse IgG1 kappa  
117 (clone P3.6.2.8.1), and FACS buffer, respectively. Each aliquot was first treated with 20  $\mu$ L of  
118 Fc receptor binding for 10 min on ice, then with 5  $\mu$ L of PE antibody or buffer for 20 min on  
119 ice. After incubation, cells were washed (2 x 1 mL) and suspended in 500  $\mu$ L of FACS buffer.  
120 FACS data were analyzed using FACSDiva (Becton Dickinson) or FloJow v10.5 (FlowJo LLC)

121 software, with gating of single cells using FSC/W and SSC/W, and gating of GFP+ and CD34  
122 PE+ cells.

123

124 **Total RNA extraction and quantitative reverse-transcription polymerase chain reaction**  
125 **(qRT-PCR)**

126 Cell pellets were treated with QIAzol lysis reagent (Qiagen) and total RNA was isolated using  
127 the miRNAeasy kit (Quiagen) combined with DNase (Qiagen) treatment according to  
128 manufacturer's instructions. Synthesis of cDNA was performed with SuperScript III First-  
129 Strand Synthesis System for RT-PCR (Life technologies) using random hexamers as primers.  
130 *CD34*, *DDIT3*, *RELB*, and *JUNB* levels were measured with specific forward and reverse  
131 primers (**Supplementary Table 3**) with Light Cycler 480 Syber Green Master mix, according  
132 to the manufacturer's instructions.

133

134 **RNA-seq library preparation and analysis**

135 RNA-seq libraries were prepared from 1 ng of total RNA using the SMART-Seq HT Kit  
136 (Takara) combined with Nextera XT kit (Illumina), according to manufacturers' instructions.  
137 One-step cDNA synthesis and double-stranded cDNA amplification was conducted with 3'  
138 SMART-Seq CDS Primer II A for priming, and SMART-Seq HT oligonucleotide for template  
139 switching at the 5' end of the transcript. The cDNA was then purified with the Agencourt  
140 AMPure XP kit, tagmented, and PCR amplified with appropriate index primers. Directional  
141 RNA-seq libraries were then sequenced 100 bp single-end on the Illumina HiSeq 2500. Reads  
142 were trimmed by Trim Galore  
143 ([http://www.bioinformatics.babraham.ac.uk/projects/trim\\_galore/](http://www.bioinformatics.babraham.ac.uk/projects/trim_galore/); v0.3.7) and then aligned to  
144 the hg38 reference genome using STAR v2.6.0c.<sup>21</sup> Differentially expressed protein-coding  
145 genes were determined by applying a threshold of log<sub>2</sub>-fold change > 1, and FDR < 0.05, using  
146 DESeq2 v1.16.1<sup>22</sup> on protein-coding gene counts normalized by housekeeping genes<sup>23</sup> as



147 input to the RUVg command within RUVseq v1.10.0.<sup>24</sup> A full description of the analysis can  
148 be found on our GitHub server: [https://github.com/GrealyLab/Johnston\\_Simoes-](https://github.com/GrealyLab/Johnston_Simoes-Pires_et_al_2019)  
149 [Pires\\_et\\_al\\_2019](https://github.com/GrealyLab/Johnston_Simoes-Pires_et_al_2019).

150

### 151 **Analysis of gene ontology enrichment and protein-protein associations**

152 The list of 97 overlapping dysregulated genes was evaluated through functional enrichment  
153 analysis with DAVID (**Supplementary File 2**).<sup>25</sup> A total of 30 genes from enriched pathways  
154 showing a p-value < 0.005 were further analyzed for their predicted protein associations in the  
155 STRING database.<sup>26</sup>

### 156 **Analysis of off-target effects**

157 Predicted gRNA off-target sites were obtained from the CRISPOR website  
158 (<http://crispor.tefor.net/crispor.py?batchId=0xd7m55fmDIcoF8EzTa9#s343+>).<sup>27</sup> These  
159 regions were then intersected by +/- 1 kb from TSSs of the 97 overlapping dysregulated genes  
160 using *bedtools2* v2.26.0.

161

### 162 **Determination of number of cell divisions**

163 A total of  $5 \times 10^4$  cells, either GFP+ (CRISPR CD34) or GFP- (control) were directly sorted  
164 into wells of a 24-well plate in culture medium. Cells were cultured and passaged every 48 h  
165 until GFP+ cells turned negative under the microscope. The total number of cells were  
166 counted at every passage, and the number of cell divisions was calculated as the population  
167 doubling level (PDL) with the formula  $n = 3.32 (\log N_{24h} - \log N_0)$ , where  $N_{24h}$  is the total number  
168 of cells after 24 h in culture, and  $N_0$  is the number of cells seeded in the previous passage.

169

## 170 **RESULTS**

171 To investigate the VP16-based CRISPR activation system, we first designed a vector for the  
172 human expression of both a scrambled gRNA and the dCas9 fused to ten repeats of VP16  
173 (VP160). In order to discriminate between transfected and non-transfected cells, green  
174 fluorescent protein (GFP) was fused to the VP160 open reading frame using a linker encoding  
175 the cleavable peptide 2A.<sup>28</sup> We used the system to target the endogenous activation of *CD34*,  
176 a gene which is not expressed in HEK 293 cells (<https://www.proteinatlas.org>).<sup>29</sup> *CD34*  
177 encodes a transmembrane protein, allowing us to discriminate easily by antibody recognition  
178 the cells expressing the protein in living cells. In a prior study, VP16 repeats directly fused to  
179 dCas9 required a pool of gRNAs for robust activation,<sup>8</sup> increasing the number of possible  
180 mismatches that could lead to off-target activation genome-wide. To test the off-target effects  
181 from multiple gRNA sequences, dCas9-VP160-2A-GFP was transfected in combination with  
182 six pooled gRNAs targeting the *CD34* promoter (**Fig. 1A**). Performing fluorescence-activated  
183 cell sorting (FACS), we demonstrated successfully induced endogenous expression of *CD34*  
184 in HEK 293T cells (**Fig. 1B**), with GFP+/CD34+ cells, showing an 80-fold increase in *CD34*  
185 mRNA levels (**Fig. 1C**). Interestingly, successfully transfected cells not expressing CD34 on  
186 the cell surface (GFP+/CD34-) also had an increase in *CD34* mRNA levels (**Fig. 1C**),  
187 suggesting a cell subpopulation with either delayed protein translation or a lack of membrane  
188 translocation. While the pooled gRNAs were indeed more effective in inducing CD34 trans-  
189 membrane expression compared to individual gRNAs, individual gRNA sequences seeding  
190 within a short distance (up to 100 nucleotides) from the transcriptional start site (TSS) were  
191 also successful, with expression levels increasing with decreasing distances from the TSS  
192 (**Supplementary Fig. 1**).

193 To evaluate whether the system induced undesirable effects genome-wide, we conducted  
194 RNA-seq analyses on the GFP+ cells transfected with the full activation system including the  
195 six gRNAs (CRISPR CD34), in comparison to non-transfected cells (Control). In addition to  
196 the strong upregulation of *CD34*, a total of 161 differentially expressed genes were identified  
197 (**Fig. 2A**). We then generated a CRISPR control by sorting GFP+ cells expressing dCas9-

198 VP160 and a scrambled gRNA (CRISPR). In this control, we detected 125 differentially  
199 expressed genes (**Fig. 2B**), with 97 of them overlapping the genes identified in the CRISPR  
200 CD34 sample (**Fig. 2C, Supplementary file 2**). Predicted gRNA off-target loci were not within  
201 1kb of the dysregulated genes' TSSs, suggesting that their differential expression was not a  
202 result of targeted dCas9-VP160 activation.

203 Nevertheless, the consistently dysregulated genes observed in the CRISPR control cells  
204 raised the question of whether side effects may occur due to the expression of dCas9, VP16  
205 repeats, or gRNAs. We evaluated these 97 genes through functional enrichment analysis and  
206 protein associations. The gene ontology analysis was significantly enriched for biological  
207 pathways related to apoptosis, response to cytokines, mechanical stimulus, inflammation, and  
208 response to endoplasmic reticulum stress and unfolded proteins, represented by a total of 30  
209 genes. Further analysis of protein-protein associations related to those genes featured the  
210 pathways of cell defense and regulation of cell death (**Fig. 3**), from which we selected three  
211 node genes (*DDIT3*, *RELB*, and *JUNB*) for further investigation.

212 *DDIT3* encodes the DNA Damage Inducible Transcript 3 transcription factor activated during  
213 endoplasmic reticulum stress.<sup>30</sup> *RELB* is a subunit of the pleiotropic transcription factor NFκB  
214 that has a central role in cell differentiation, growth, apoptosis, inflammation, and immunity.<sup>31-</sup>  
215 <sup>33</sup> *JUNB*, a component of the AP1 transcription factor, has a role in stress response and is  
216 associated with the NFκB pathway.<sup>34-37</sup>

217 Assessing the impact of the various CRISPR activation system components, we quantified the  
218 changes in expression of the selected genes in GFP+ cells transfected with distinct CRISPR  
219 components (**Fig. 4A**). Considering that the absolute amounts of foreign DNA introduced into  
220 cells may contribute to the degree of the observed stress response, we used equimolar  
221 plasmid concentrations across test conditions. First, we confirmed the activation of *CD34* in  
222 the CRISPR CD34 cells only in the presence of the targeted gRNAs; it was not induced by the  
223 expression of gRNAs alone (gRNA control) nor any other isolated component of the system  
224 (**Fig. 4B**). The stress-related genes *DDIT3*, *RELB* and *JUNB* were induced across all samples

225 containing the CRISPR components. Expression of gRNAs in their untargeted form, either in  
226 the absence of dCas9 (gRNA control) or with a scrambled sequence in the presence of dCas9  
227 (CRISPR and dCas9 controls), demonstrated a robust elevation of the stress-related genes'  
228 expression (**Fig. 4B**).

229 We then investigated whether cells transfected with the CRISPR activation system were able  
230 to return to their basal expression levels over multiple cell divisions. To do this, we kept the  
231 activated GFP+ cells in culture until cells were negative for GFP fluorescence under the  
232 microscope (after 10 cell divisions). At this point, the cells were analyzed by FACS and sorted  
233 for GFP- populations to ensure that the CRISPR components had been eliminated from the  
234 cells. We demonstrated that the upregulated stress-response genes returned to their basal  
235 levels (**Fig. 5**), indicating the absence of a memory effect for both *CD34* and the cellular stress  
236 response genes.

237

## 238 **DISCUSSION**

239 Taken together, our results point to the activation of stress genes as a side effect upon the  
240 expression of CRISPR components, especially untargeted gRNAs, not necessarily related to  
241 the presence of VP16 or to gRNA off-target sequences. Indeed, previous findings have shown  
242 that dCas9 has a higher residence time at a targeted genomic locus than at off-target loci,<sup>38</sup>  
243 potentially contributing to the high specificity of gRNAs in the dCas9-VP16-based epigenetic  
244 activation systems.

245 The outcome of undesirable transcriptional regulation is of concern when using dCas9 fused  
246 to effectors for epigenetic editing. The changes in cellular properties resulting from epigenetic  
247 editing might be expected to be heritable, as this is one definition of cellular epigenetic  
248 properties.<sup>39</sup> If side effects affecting gene expression are maintained through cell division,  
249 they will be difficult to uncouple from the desired effect of the epigenetic editing. Moreover,

250 heritable side effects may constitute a pitfall in developing CRISPR technologies for the  
251 development of therapeutic applications.

252 Our findings reveal an acute cellular response to the components of the CRISPR activation  
253 system, which dissipates over the course of multiple cell divisions. While this is reassuring for  
254 the use of CRISPR-mediated epigenetic editing, we note that the effects observed involve the  
255 transient activation of transcription factors. Transient upregulation of transcription factors may  
256 induce downstream pathways, which in turn can be irreversible. One example is the role of  
257 pioneer transcription factors in somatic cell reprogramming.<sup>40</sup> Accordingly, the transcription  
258 factor DDIT3, predominantly related to the stress response, has been identified as a regulatory  
259 node in erythroid lineage cell programming.<sup>41</sup> Furthermore, we only examined the genome-  
260 wide expression consequences of a transient CRISPR transfection in one cell line; the  
261 potential long-term transcriptional effects of stably transfected CRISPR machinery or differing  
262 cellular response by other cell types warrant further investigation.

263

## 264 **CONCLUSION**

265 An acute stress response occurs in cells when CRISPR components are used for gene  
266 activation. Although transient, the response was mediated through the upregulation of  
267 transcription factors that may, in certain cell systems, independently lead to reprogramming  
268 effects. Therefore, the impact of CRISPR components on transcription factors should be  
269 carefully taken into consideration when designing CRISPR genetic and epigenetic editing  
270 tools.

271

## 272 **ACKNOWLEDGEMENTS**

273 The current project has received funding from the European Union's Horizon 2020 research  
274 and innovation programme under the Marie Skłodowska-Curie grant agreement No 750190.

275

276 **DATA AVAILABILITY**

277 All genome sequencing data are available from the NCBI Gene Expression Omnibus

278 database under accession number GSE11827

279 (<https://www.ncbi.nlm.nih.gov/geo/query/acc.cgi?acc=GSE118277>; reviewer token:

280 ujjuqqzlkjby).

281 **CODE AVAILABILITY**

282 The code files for the all analyses are available at

283 [https://github.com/GrealyLab/Johnston\\_Simoese-Pires\\_et\\_al\\_2019](https://github.com/GrealyLab/Johnston_Simoese-Pires_et_al_2019).

284 **REFERENCES**

- 285 1. Adli M. The CRISPR tool kit for genome editing and beyond. *Nat Commun.* 2018;9:1911.  
286 DOI: 10.1038/s41467-018-04252-2
- 287 2. Holtzman L, Gersbach CA. Editing the epigenome: reshaping the genomic landscape.  
288 *Annual Review of Genomics and Human Genetics.* 2018;19:43-71. DOI: 10.1146/annurev-  
289 genom-083117-021632
- 290 3. Johnston AD, Simões-Pires CA, Thompson TV, Suzuki M, Grealley JM. Functional genetic  
291 variants can mediate their regulatory effects through alteration of transcription factor binding.  
292 *Nat Commun.* 2019;10:3472-3472. DOI: 10.1038/s41467-019-11412-5
- 293 4. Wu X, Scott DA, Kriz AJ, Chiu AC, Hsu PD, Dadon DB, Cheng AW, Trevino AE,  
294 Konermann S, Chen S, Jaenisch R, Zhang F, Sharp PA. Genome-wide binding of the  
295 CRISPR endonuclease Cas9 in mammalian cells. *Nat Biotechnol.* 2014;32:670-676. DOI:  
296 10.1038/nbt.2889
- 297 5. Lee JK, Jeong E, Lee J, Jung M, Shin E, Kim YH, Lee K, Jung I, Kim D, Kim S, Kim JS.  
298 Directed evolution of CRISPR-Cas9 to increase its specificity. *Nat Commun.* 2018;9:3048.  
299 DOI: 10.1038/s41467-018-05477-x
- 300 6. Chavez A, Tuttle M, Pruitt BW, Ewen-Campen B, Chari R, Ter-Ovanesyan D, Haque SJ,  
301 Cecchi RJ, Kowal EJK, Buchthal J, Housden BE, Perrimon N, Collins JJ, Church G.  
302 Comparison of Cas9 activators in multiple species. *Nat Methods.* 2016;13:563-567. DOI:  
303 10.1038/nmeth.3871
- 304 7. Perez-Pinera P, Kocak DD, Vockley CM, Adler AF, Kabadi AM, Polstein LR, Thakore PI,  
305 Glass KA, Ousterout DG, Leong KW, Guilak F, Crawford GE, Reddy TE, Gersbach CA.  
306 RNA-guided gene activation by CRISPR-Cas9–based transcription factors. *Nat Methods.*  
307 2013;10:973. DOI: 10.1038/nmeth.2600
- 308 8. Mali P, Aach J, Stranges PB, Esvelt KM, Moosburner M, Kosuri S, Yang L, Church GM.  
309 CAS9 transcriptional activators for target specificity screening and paired nickases for

- 310 cooperative genome engineering. *Nature biotechnology*. 2013;31:833-838. DOI:  
311 10.1038/nbt.2675
- 312 9. Wysocka J, Herr W. The herpes simplex virus VP16-induced complex: the makings of a  
313 regulatory switch. *Trends Biochem Sci*. 2003;28:294-304. DOI: 10.1016/S0968-  
314 0004(03)00088-4
- 315 10. Chakraborty S, Ji H, Kabadi Ami M, Gersbach Charles A, Christoforou N, Leong Kam W.  
316 A CRISPR/Cas9-based system for reprogramming cell lineage specification. *Stem Cell Rep*.  
317 2014;3:940-947. DOI: 10.1016/j.stemcr.2014.09.013
- 318 11. Chavez A, Scheiman J, Vora S, Pruitt BW, Tuttle M, E PRI, Lin S, Kiani S, Guzman CD,  
319 Wiegand DJ, Ter-Ovanesyan D, Braff JL, Davidsohn N, Housden BE, Perrimon N, Weiss R,  
320 Aach J, Collins JJ, Church GM. Highly efficient Cas9-mediated transcriptional programming.  
321 *Nat Methods*. 2015;12:326-328. DOI: 10.1038/nmeth.3312
- 322 12. Gilbert LA, Horlbeck MA, Adamson B, Villalta JE, Chen Y, Whitehead EH, Guimaraes C,  
323 Panning B, Ploegh HL, Bassik MC, Qi LS, Kampmann M, Weissman JS. Genome-scale  
324 CRISPR-mediated control of gene repression and activation. *Cell*. 2014;159:647-661. DOI:  
325 10.1016/j.cell.2014.09.029
- 326 13. Konermann S, Brigham MD, Trevino AE, Joung J, Abudayyeh OO, Barcena C, Hsu PD,  
327 Habib N, Gootenberg JS, Nishimasu H, Nureki O, Zhang F. Genome-scale transcriptional  
328 activation by an engineered CRISPR-Cas9 complex. *Nature*. 2015;517:583-588. DOI:  
329 10.1038/nature14136
- 330 14. Tanenbaum ME, Gilbert LA, Qi LS, Weissman JS, Vale RD. A protein-tagging system for  
331 signal amplification in gene expression and fluorescence imaging. *Cell*. 2014;159:635-646.  
332 DOI: 10.1016/j.cell.2014.09.039
- 333 15. Zalatan JG, Lee ME, Almeida R, Gilbert LA, Whitehead EH, La Russa M, Tsai JC,  
334 Weissman JS, Dueber JE, Qi LS, Lim WA. Engineering complex synthetic transcriptional  
335 programs with CRISPR RNA scaffolds. *Cell*. 2015;160:339-350. DOI:  
336 10.1016/j.cell.2014.11.052



- 337 16. Kim S, Koo T, Jee HG, Cho HY, Lee G, Lim DG, Shin HS, Kim JS. CRISPR RNAs  
338 trigger innate immune responses in human cells. *Genome Res.* 2018. DOI:  
339 10.1101/gr.231936.117
- 340 17. Schubert MS, Cedrone E, Neun B, Behlke MA, Dobrovolskaia MA. Chemical  
341 Modification of CRISPR gRNAs Eliminate type I Interferon Responses in Human Peripheral  
342 Blood Mononuclear Cells. *J Cytokine Biol.* 2018;3. DOI: 10.4172/2576-3881.1000121
- 343 18. Cheng AW, Wang H, Yang H, Shi L, Katz Y, Theunissen TW, Rangarajan S, Shivalila  
344 CS, Dadon DB, Jaenisch R. Multiplexed activation of endogenous genes by CRISPR-on, an  
345 RNA-guided transcriptional activator system. *Cell Res.* 2013;23:1163-1171. DOI:  
346 10.1038/cr.2013.122
- 347 19. Yu J, Zhang L, Hwang PM, Rago C, Kinzler KW, Vogelstein B. Identification and  
348 classification of p53-regulated genes. *Proc Natl Acad Sci U S A.* 1999;96:14517-14522.
- 349 20. Mali P, Yang L, Esvelt KM, Aach J, Guell M, DiCarlo JE, Norville JE, Church GM. RNA-  
350 guided human genome engineering via Cas9. *Science.* 2013;339:823-826. DOI:  
351 10.1126/science.1232033
- 352 21. Dobin A, Davis CA, Schlesinger F, Drenkow J, Zaleski C, Jha S, Batut P, Chaisson M,  
353 Gingeras TR. STAR: ultrafast universal RNA-seq aligner. *Bioinformatics.* 2013;29:15-21.  
354 DOI: 10.1093/bioinformatics/bts635
- 355 22. Love MI, Huber W, Anders S. Moderated estimation of fold change and dispersion for  
356 RNA-seq data with DESeq2. *Genome Biol.* 2014;15:550. DOI: 10.1186/s13059-014-0550-8
- 357 23. Eisenberg E, Levanon EY. Human housekeeping genes, revisited. *Trends Genet.*  
358 2013;29:569-574. DOI: 10.1016/j.tig.2013.05.010
- 359 24. Risso D, Ngai J, Speed TP, Dudoit S. Normalization of RNA-seq data using factor  
360 analysis of control genes or samples. *Nat Biotechnol.* 2014;32:896. DOI: 10.1038/nbt.2931
- 361 25. Huang da W, Sherman BT, Lempicki RA. Systematic and integrative analysis of large  
362 gene lists using DAVID bioinformatics resources. *Nat Protoc.* 2009;4:44-57. DOI:  
363 10.1038/nprot.2008.211

- 364 26. Szklarczyk D, Morris JH, Cook H, Kuhn M, Wyder S, Simonovic M, Santos A, Doncheva  
365 NT, Roth A, Bork P, Jensen LJ, von Mering C. The STRING database in 2017: quality-  
366 controlled protein-protein association networks, made broadly accessible. *Nucleic Acids*  
367 *Res.* 2017;45:D362-d368. DOI: 10.1093/nar/gkw937
- 368 27. Haeussler M, Schönig K, Eckert H, Eschstruth A, Mianné J, Renaud J-B, Schneider-  
369 Maunoury S, Shkumatava A, Teboul L, Kent J, Joly J-S, Concordet J-P. Evaluation of off-  
370 target and on-target scoring algorithms and integration into the guide RNA selection tool  
371 CRISPOR. *Genome Biology.* 2016;17:148. DOI: 10.1186/s13059-016-1012-2
- 372 28. Kim JH, Lee SR, Li LH, Park HJ, Park JH, Lee KY, Kim MK, Shin BA, Choi SY. High  
373 cleavage efficiency of a 2A peptide derived from porcine teschovirus-1 in human cell lines,  
374 zebrafish and mice. *PLoS One.* 2011;6:e18556. DOI: 10.1371/journal.pone.0018556
- 375 29. Uhlen M, Oksvold P, Fagerberg L, Lundberg E, Jonasson K, Forsberg M, Zwahlen M,  
376 Kampf C, Wester K, Hober S, Wernerus H, Bjorling L, Ponten F. Towards a knowledge-  
377 based Human Protein Atlas. *Nat Biotechnol.* 2010;28:1248-1250. DOI: 10.1038/nbt1210-  
378 1248
- 379 30. Vihervaara A, Duarte FM, Lis JT. Molecular mechanisms driving transcriptional stress  
380 responses. *Nat Rev Genet.* 2018;19:385-397. DOI: 10.1038/s41576-018-0001-6
- 381 31. Marienfeld R, May MJ, Berberich I, Serfling E, Ghosh S, Neumann M. RelB forms  
382 transcriptionally inactive complexes with RelA/p65. *J Biol Chem.* 2003;278:19852-19860.  
383 DOI: 10.1074/jbc.M301945200
- 384 32. Yun JJ, Tsao M-S, Der SD. Differential utilization of NF-kappaB RELA and RELB in  
385 response to extracellular versus intracellular polyIC stimulation in HT1080 cells. *BMC*  
386 *Immunol.* 2011;12:15-15. DOI: 10.1186/1471-2172-12-15
- 387 33. Hayden MS, Ghosh S. Signaling to NF-kappaB. *Genes Dev.* 2004;18:2195-2224. DOI:  
388 10.1101/gad.1228704
- 389 34. Fan F, Bashari MH, Morelli E, Tonon G, Malvestiti S, Vallet S, Jarahian M, Seckinger A,  
390 Hose D, Bakiri L, Sun C, Hu Y, Ball CR, Glimm H, Sattler M, Goldschmidt H, Wagner EF,  
391 Tassone P, Jaeger D, Podar K. The AP-1 transcription factor JunB is essential for multiple

- 392 myeloma cell proliferation and drug resistance in the bone marrow microenvironment.  
393 *Leukemia*. 2017;31:1570-1581. DOI: 10.1038/leu.2016.358
- 394 35. Hyakusoku H, Sano D, Takahashi H, Hatano T, Isono Y, Shimada S, Ito Y, Myers JN,  
395 Oridate N. JunB promotes cell invasion, migration and distant metastasis of head and neck  
396 squamous cell carcinoma. *J Exp Clin Cancer Res*. 2016;35:6. DOI: 10.1186/s13046-016-  
397 0284-4
- 398 36. Hicks MJ, Hu Q, Macrae E, DeWille J. Mitogen-activated protein kinase signaling  
399 controls basal and oncostatin M-mediated JUNB gene expression. *Mol Cell Biochem*.  
400 2015;403:115-124. DOI: 10.1007/s11010-015-2342-1
- 401 37. Hicks M, Hu Q, Macrae E, DeWille J. JUNB promotes the survival of Flavopiridol treated  
402 human breast cancer cells. *Biochem Biophys Res Commun*. 2014;450:19-24. DOI:  
403 10.1016/j.bbrc.2014.05.057
- 404 38. Knight SC, Xie L, Deng W, Guglielmi B, Witkowsky LB, Bosanac L, Zhang ET, El Beheiry  
405 M, Masson JB, Dahan M, Liu Z, Doudna JA, Tjian R. Dynamics of CRISPR-Cas9 genome  
406 interrogation in living cells. *Science*. 2015;350:823-826. DOI: 10.1126/science.aac6572
- 407 39. Riggs AD, Martienssen RA, Russo VEA. Introduction In: *Epigenetic mechanisms of gene*  
408 *regulation*. Cold Spring Harbor Laboratory Press, North America. 1996.
- 409 40. Xu Y, Zhang M, Li W, Zhu X, Bao X, Qin B, Hutchins AP, Esteban MA. Transcriptional  
410 control of somatic cell reprogramming. *Trends Cell Biol*. 2016;26:272-288. DOI:  
411 10.1016/j.tcb.2015.12.003
- 412 41. Pina C, Teles J, Fugazza C, May G, Wang D, Guo Y, Soneji S, Brown J, Edén P,  
413 Ohlsson M, Peterson C, Enver T. Single-cell network analysis identifies DDIT3 as a nodal  
414 lineage regulator in hematopoiesis. *Cell Rep*. 2015;11:1503-1510. DOI:  
415 10.1016/j.celrep.2015.05.016
- 416
- 417

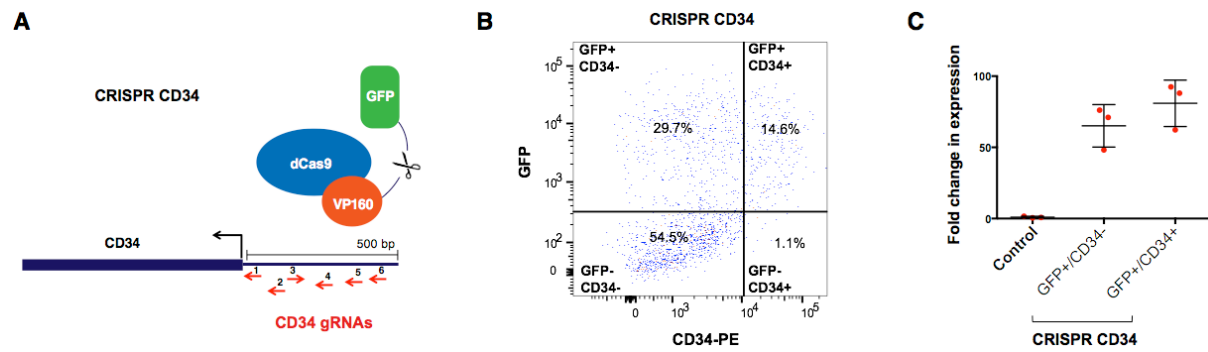

418

419 **Fig. 1.** Ectopic gene activation of *CD34* with the CRISPR activation system using the sgRNA-  
420 dCas9-VP160-2A-GFP vector combined with 6 gRNAs. **A)** Overview of the CRISPR *CD34*  
421 activation system: 6 gRNAs targeting the promoter of *CD34* within 500 bp from the TSS were  
422 co-transfected with a vector expressing dCas9 fused to 10 repeats of the transactivation  
423 peptide VP16, released from GFP by a cleavable peptide. **B)** FACS analysis of HEK 293 cells  
424 transfected with the CRISPR *CD34* activation system. GFP+/CD34- and GFP+/CD34+ cells  
425 were sorted for subsequent analysis. **C)** The fold changes in expression in sorted cells relative  
426 to control measured by qRT-PCR.

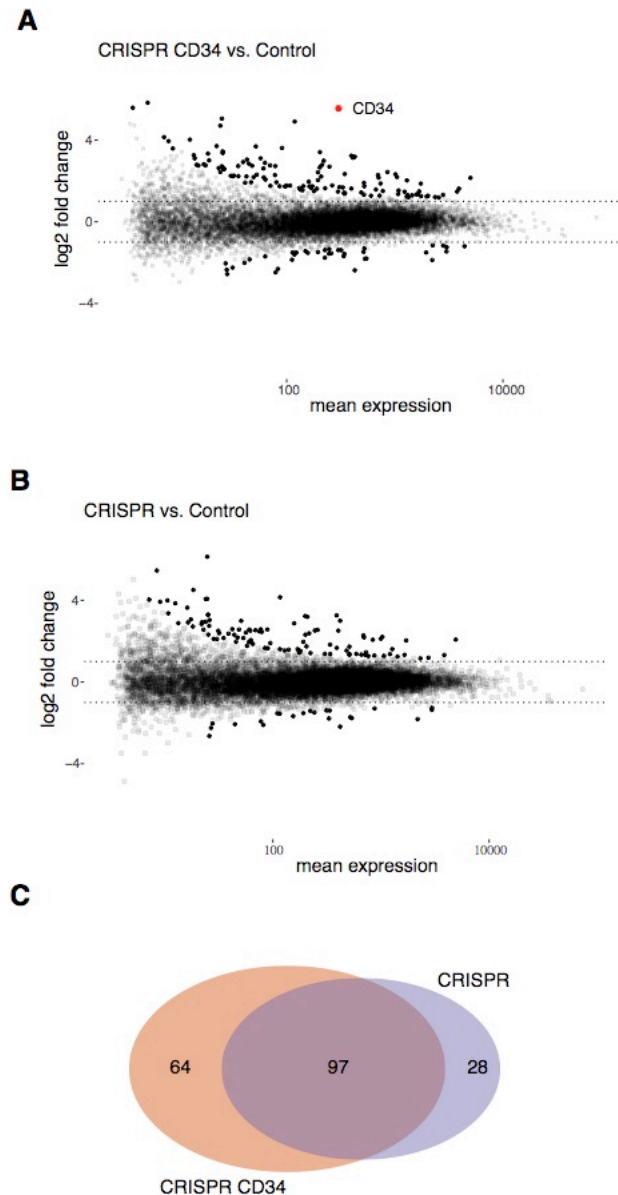

427

428 **Fig. 2.** Differentially expressed genes with the CRISPR CD34 activation system and the  
429 CRISPR system in the absence of targeted gRNAs. **A)** RNA-seq MA plot of CRISPR CD34  
430 compared with control. Black solid dots are the differentially expressed genes ( $\log_2$  fold  
431 change  $> 1$ ,  $FDR < 0.5$ ). Differentially expressed *CD34* is represented by a solid red dot. **B)**  
432 RNA-seq MA plot of CRISPR control compared with control. Black solid dots are the  
433 differentially expressed genes ( $\log_2$  fold change  $> 2$ ,  $FDR < 0.5$ ). *CD34* is not differentially  
434 expressed. **C)** Venn diagram representing the 97 differentially expressed genes in common  
435 between CRISPR CD34 and CRISPR control.

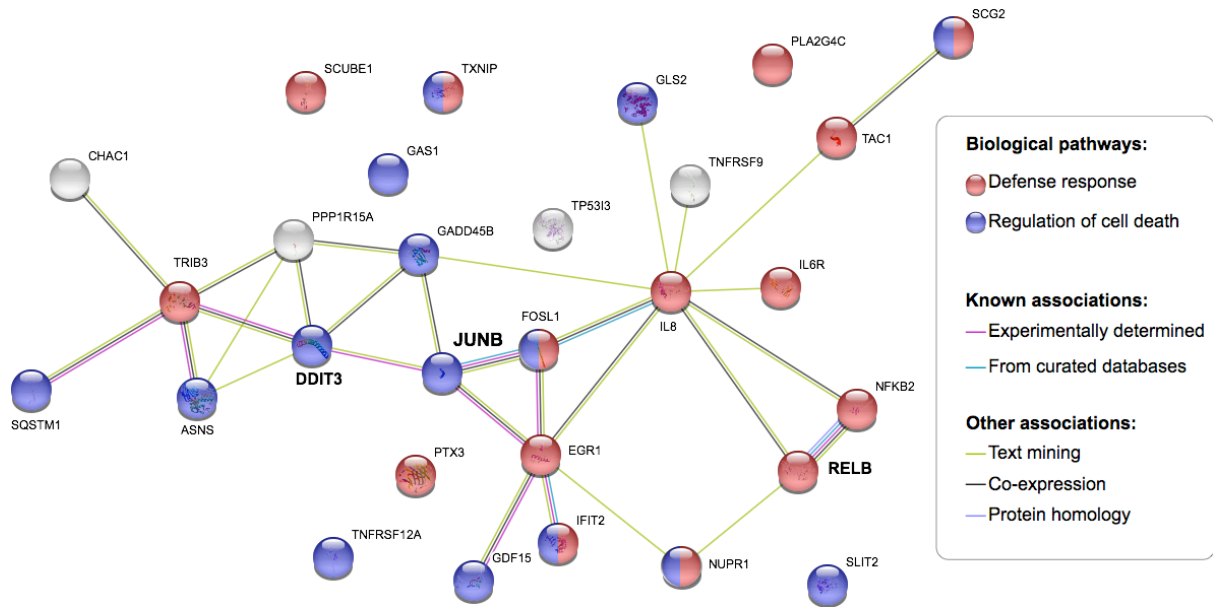

436

437 **Fig. 3. Protein-protein associations among genes selected from gene ontology**  
438 **analysis.** Analysis from STRING database (<https://string-db.org/>). The genes *DDIT3*, *JUNB*  
439 and *RELB* were selected for further studies as central to the regulation of these defense  
440 response and cell death regulatory pathways.

A

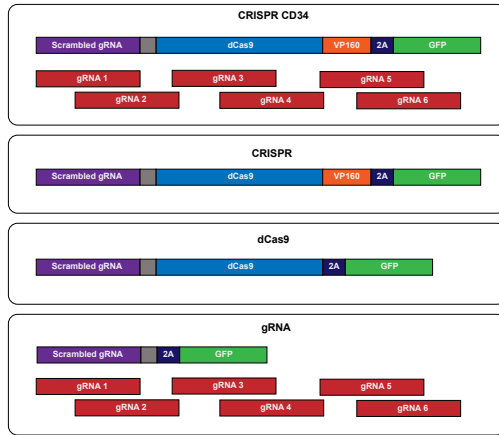

B

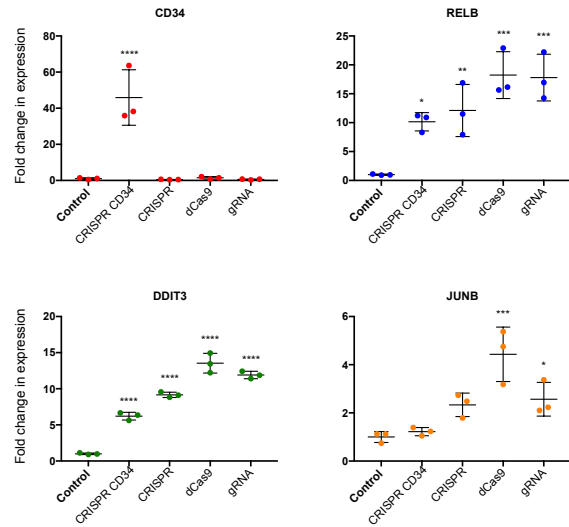

441

442 **Fig 4. Relative RNA expression of CD34 and stress-related genes across CRISPR**

443 **conditions. A) s of the expression vectors transfected in each condition. B) Acute fold change**

444 **in gene expression relative to control at 48 hours after transfection. P-values: \* $\leq$  0.05; \*\*\* $\leq$**

445 **0.001; \*\*\*\* $\leq$  0.0001.**

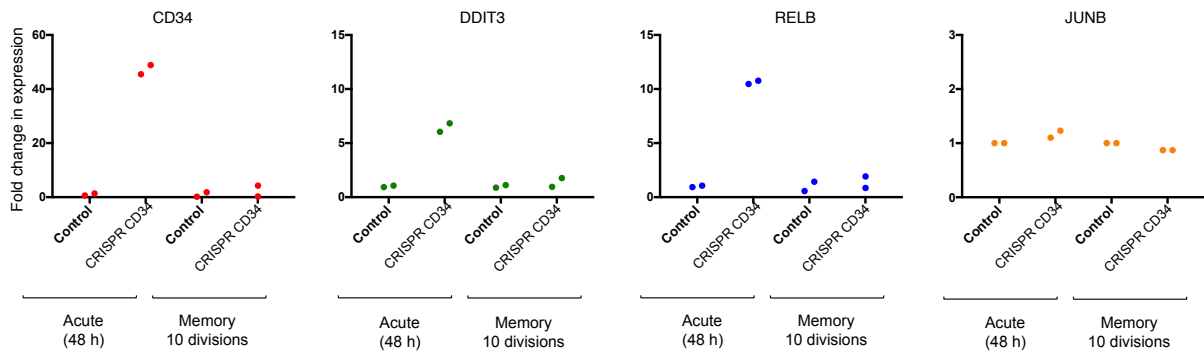

446

447 **Fig. 5. Change in gene expression relative to control in transfected cells after 10 cell**  
448 **divisions in comparison to the acute response.** The expected induction of gene  
449 expression is seen acutely at 48 h, with complete resolution when 10 cell divisions have  
450 occurred in these GFP- cells.



**A**

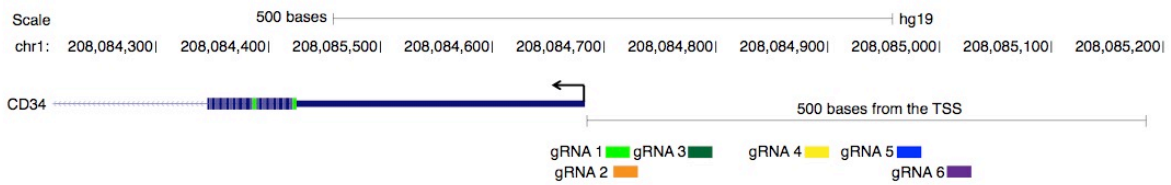

**B**

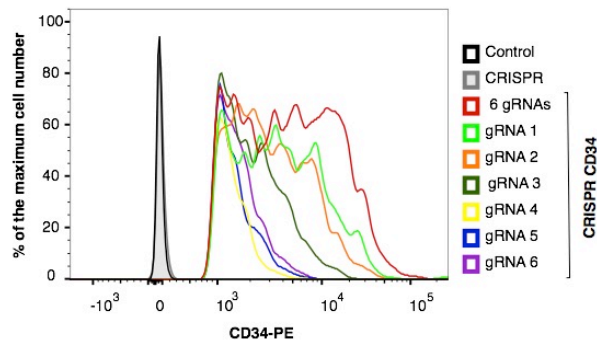

**C**

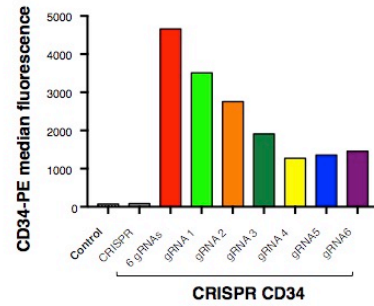

451

452 **Supplementary Fig. 1. The efficiency of gRNA sequences in the activation of *CD34***

453 **using the VP16-based CRISPR activation system. A)** The position of gRNAs 1-6 relative to

454 the *CD34* transcriptional start site (TSS). **B)** FACS histograms depicting *CD34* expression in

455 cells transfected with the CRISPR activation system, followed by **C)** a bar graph depicting their

456 median *CD34*-PE fluorescence.

457 **Supplementary Table 1. gRNA sequences.**

| <b>gRNA</b> | <b>Sequence</b>     | <b>PAM</b> | <b>Distance to the TSS*</b> |
|-------------|---------------------|------------|-----------------------------|
| 1           | GAAAGCTGAACGAGGCATC | TGG        | -19                         |
| 2           | CTCTCCAGAAAGCTGAACG | AGG        | -26                         |
| 3           | CCGGCAAGGCTGCCACAAA | GGG        | -93                         |
| 4           | CCTTTTGCAAGATTGTTAC | TGG        | -197                        |
| 5           | CACTAAATGTGCCACATTG | TGG        | -280                        |
| 6           | TGTGTGTGAGTGAAGCGTC | AGG        | -324                        |
| Scramble    | GGGTCTTCGAGAAGACCT  | -          | -                           |

458

459 \*TSS = transcriptional start site, defined as the first nucleotide in the gene transcript sequence

460 including the UTR according to the Human Feb. 2009 (GRCh37/hg19) assembly (UCSC

461 browser).

462 **Supplementary Table 2. Amount of transfected vectors per 100 mm dishes across**  
 463 **CRISPR conditions.**

| Condition   | Vector (pmol)                |                        |              |         |                                         | 464 |
|-------------|------------------------------|------------------------|--------------|---------|-----------------------------------------|-----|
|             | sgRNA-<br>dCas9-VP160-2A-GFP | sgRNA-<br>dCas9-2A-GFP | sgRNA-2A-GFP | 6 gRNAs | gRNA cloning vector<br>(empty backbone) | 465 |
| CRISPR CD34 | 1.93                         | -                      | -            | 3.47*   | -                                       | 466 |
| CRISPR      | 1.93                         | -                      | -            | -       | 3.47                                    | 467 |
| dCas9       | -                            | 1.93                   | -            | -       | 3.47                                    | 468 |
| gRNA        | -                            | -                      | 1.93         | 3.47*   | -                                       | 469 |

474

475 \* Divided into equal amounts of each vector.

476 **Supplementary Table 3. qRT PCR primers.**

| Gene         | Forward primer          | Reverse primer        |
|--------------|-------------------------|-----------------------|
| <i>CD34</i>  | AATAGCCAGTGATGCCCAAG    | GGTATGCTCCCTGCTCCTT   |
| <i>DDIT3</i> | GGAACCTGAGGAGAGAGTGTTTC | TGCCATCTCTGCAGTTGGAT  |
| <i>RELB</i>  | CAGTGTGTGAGGAAGAAGGAG   | CCGCAGCTCTGATGTGTTTGT |
| <i>JUNB</i>  | CCACCTCCCGTTTACACCAA    | GAGGTAGCTGATGGTGGTTCG |

477

478

479 **Supplementary file 1**

480 **Sequence of plasmid sgRNA-dCas9-VP160-2A-GFP**

481 U6 promoter

482 gRNA scaffold with [scrambled target sequence](#)

483 dCas9

484 VP160

485 2A peptide

486 GFP

487 GAGGGCCTATTTCCCATGATTCTTCATATTTGCATATACGATACAAGGCTGTTAGAGAGATAATTGGAATTAAT  
488 TTGACTGTAAACACAAAGATATTAGTACAAAATACGTGACGTAGAAAGTAATAATTTCTTGGGTAGTTTGCAGTT  
489 TTAAAATTATGTTTTAAAATGGACTATCATATGCTTACCGTAACTTGAAAGTATTTTCGATTTCTTGGCTTTATAT  
490 ATCTTGTGAAAGGACGAAACACCGGGTCTTCGAGAAGACCTGTTTTAGAGCTAGAAAATAGCAAGTTAAAATAAG  
491 GCTAGTCCGTTATCAACTTGAAAAAGTGGCACCGAGTCGGTGCTTTTTTGTTTTAGAGCTAGAAATAGCAAGTTA  
492 AAATAAGGCTAGTCCGTTTTTTAGCGCGTGCCCAATTCCTGCAGACAAAATGGCTCTAGAGGTACCCGTTACATAAC  
493 TTACGGTAAATGGCCCGCCTGGCTGACCGCCCAACGACCCCCGCCCATTGACGTCAATAGTAACGCCAATAGGGA  
494 CTTTCCATTGACGTCAATGGGTGGAGTATTTACGGTAAACTGCCCACTTGGCAGTACATCAAGTGTATCATATGC  
495 CAAGTACGCCCCCTATTGACGTCAATGACGGTAAATGGCCCGCCTGGCATTGTGCCAGTACATGACCTTATGGG  
496 ACTTTCCTACTTGGCAGTACATCTACGTATTAGTCATCGCTATTACCATGGTCGAGGTGAGCCCCACGTTCTGCT  
497 TCACTCTCCCCATCTCCCCCCCCCTCCCCACCCCAATTTTGTATTTATTTATTTTAAATTAATTTTGTGCAGCGA  
498 TGGGGGCGGGGGGGGGGGGGGGGGCGCGGCCAGGCGGGCGGGCGGGCGAGGGCGGGCGGGCGAGGCGGA  
499 GAGGTGCGGCGGCAGCCAATCAGAGCGGCGCGCTCCGAAAGTTTCTTTTATGGCGAGGCGGCGGGCGGGCGGC  
500 CCTATAAAAAGCGAAGCGCGCGGGCGGGAGTCGCTGCGACGCTGCCTTCGCCCCGTGCCCGCTCCGCCGCC  
501 GCCTCGCGCCGCCCGCCCCGGCTCTGACTGACCGCGTTACTCCCACAGGTGAGCGGGCGGGACGGCCCTTCCTCT  
502 CCGGGCTGTAATTAGCTGAGCAAGAGGTTAAGGGATGGTTGGTTGGTGGGGTATTAATGTTTAATTAC  
503 CTGGAGCACCTGCCTGAAATCACTTTTTTTTTCAGGTTGGACCGGTGCCACCATGTACCATACGATGTTCCAGATT  
504 ACGCTTCGCCGAAGAAAAAGCGCAAGGTCGAAGCGTCCGACAAGAAGTACAGCATCGGCCCTGGCCATCGGCACCA  
505 ACTCTGTGGGCTGGGCCGTGATCACCGACGAGTACAAGGTGCCAGCAAGAAATTCAAGGTGCTGGGCAACACCG  
506 ACCGGCACAGCATCAAGAAGAACCTGATCGGAGCCCTGCTGTTTCGACAGCGGCGAAACAGCCGAGGCCACCCGGC  
507 TGAAGAGAACCGCCAGAAGAAGATACACCAGACGGAAGAACCGGATCTGCTATCTGCAAGAGATCTTCAGCAACG

508 AGATGGCCAAGGTGGACGACAGCTTCTTCCACAGACTGGAAGAGTCCTTCTGGTGGAAAGAGGATAAGAAGCAG  
509 AGCGGCACCCCATCTTCGGCAACATCGTGGACGAGGTGGCTACCACGAGAAGTACCCACCATCTACCACCTGA  
510 GAAAGAAACTGGTGGACAGCACCGACAAGGCCGACCTGCGGCTGATCTATCTGGCCCTGGCCACATGATCAAGT  
511 TCCGGGGCCACTTCTGATCGAGGGCGACCTGAACCCCGACAACAGCGACGTGGACAAGCTGTTTCATCCAGCTGG  
512 TGCAGACCTACAACCAGCTGTTTCGAGGAAAACCCCATCAACGCCAGCGGCGTGGACGCCAAGGCCATCCTGTCTG  
513 CCAGACTGAGCAAGAGCAGACGGCTGGAAAATCTGATCGCCAGCTGCCCGGCGAGAAGAAGAATGGCTGTTCG  
514 GCAACCTGATTGCCCTGAGCCTGGGCCTGACCCCAACTTCAAGAGCAACTTCGACCTGGCCGAGGATGCCAAAC  
515 TGCAGCTGAGCAAGGACACCTACGACGACGACCTGGACAACCTGCTGGCCAGATCGGCGACCAGTACGCCGACC  
516 TGTTTCTGGCCGCCAAGAACCTGTCCGACGCCATCCTGCTGAGCGACATCCTGAGAGTGAACACCGAGATCACCA  
517 AGGCCCCCTGAGCGCCTCTATGATCAAGAGATACGACGAGCACCACCAGGACCTGACCTGCTGAAAGCTCTCG  
518 TCGCGCAGCAGCTGCCTGAGAAGTACAAAGAGATTTTCTTCGACCAGAGCAAGAACGGCTACGCCGGCTACATTG  
519 ACGGCGGAGCCAGCCAGGAAGAGTTCTACAAGTTCATCAAGCCCATCCTGGAAAAGATGGACGGCACCAGGAAC  
520 TGCTCGTGAAGCTGAACAGAGAGGACCTGCTGCGGAAGCAGCGGACCTTCGACAACGGCAGCATCCCCACCAGA  
521 TCCACCTGGGAGAGCTGCACGCCATTCTGCGGCGCAGGAAGATTTTTACCCATCCTGAAGGACAACCGGGAAA  
522 AGATCGAGAAGATCCTGACCTTCCGCATCCCTACTACGTGGGCCCTCTGGCCAGGGGAAACAGCAGATTCGCCT  
523 GGATGACCAGAAAGAGCGAGGAAACCATCACCCCTGGAACCTTCGAGGAAGTGGTGGACAAGGGCGCTTCCGCC  
524 AGAGCTTCATCGAGCGGATGACCAACTTCGATAAGAACCTGCCAACGAGAAGGTGCTGCCAAGCACAGCCTGC  
525 TGTACGAGTACTTCACCGTGTATAACGAGCTGACCAAAGTGAATAACGTGACCGAGGGAATGAGAAAGCCGCCT  
526 TCCTGAGCGGCGAGCAGAAAAAGGCCATCGTGGACCTGCTGTTCAAGACCAACCGGAAAGTGACCGTGAAGCAG  
527 TGAAAGAGGACTACTTCAAGAAAATCGAGTGTTCGACTCCGTGGAATCTCCGGCGTGGAAGATCGGTTCAACG  
528 CCTCCCTGGGCACATAACCACGATCTGCTGAAAAATTATCAAGGACAAGGACTTCCTGGACAATGAGGAAAACGAG  
529 ACATTCTGGAAGATATCGTGCTGACCTGACACTGTTTGAGGACAGAGAGATGATCGAGGAACGGCTGAAAACCT  
530 ATGCCACCTGTTTCGACGACAAAGTGATGAAGCAGCTGAAGCGGCGGAGATACACCGGCTGGGGCAGGCTGAGCC  
531 GGAAGCTGATCAACGGCATCCGGGACAAGCAGTCCGGCAAGACAATCCTGGATTTCTGAAGTCCGACGGCTTCG  
532 CCAACAGAACTTCATGCAGCTGATCCACGACGACAGCCTGACCTTTAAAGAGGACATCCAGAAAGCCCAGGTGT  
533 CCGGCCAGGGCGATAGCCTGCACGAGCACATTGCCAATCTGGCCGGCAGCCCCGCCATTAAGAAGGGCATCCTGC  
534 AGACAGTGAAGGTGGTGGACGAGCTCGTGAAAAGTGATGGGCCGGCACAAGCCCCGAGAACATCGTGATCGAAATGG  
535 CCAGAGAGAACCAGACCACCCAGAAGGGACAGAAGAACAGCCGCGAGAGAATGAAGCGGATCGAAGAGGGCATCA  
536 AAGAGCTGGGCAGCCAGATCCTGAAAGAACACCCCGTGAAAACACCCAGCTGCAGAACGAGAAGCTGTACCTGT  
537 ACTACCTGCAGAATGGGCGGGATATGTACGTGGACCAGGAACTGGACATCAACCGGCTGTCCGACTACGATGTGG  
538 ACGCCATCGTGCCTCAGAGCTTTCTGAAGGACGACTCCATCGACAACAAGGTGCTGACCAGAAGCGACAAGAACC  
539 GGGGCAAGAGCGACAACGTGCCCTCCGAAGAGGTGCTGAAGAAGATGAAGAACTACTGGCGGCAGCTGCTGAACG

540 CCAAGCTGATTACCCAGAGAAAGTTCGACAATCTGACCAAGGCCGAGAGAGGGCGCCTGAGCGAACTGGATAAGG  
541 CCGGCTTCATCAAGAGACAGCTGGTGGAAACCCGGCAGATCACAAAGCACGTGGCACAGATCCTGGACTCCCGGA  
542 TGAACACTAAGTACGACGAGAATGACAAGCTGATCCGGGAAGTGAAAGTGATCACCTGAAGTCCAAGCTGGTGT  
543 CCGATTTCCGGAAGGATTTCCAGTTTTACAAAGTGCGCGAGATCAACAACCTACCACCACGCCACGACGCCCTACC  
544 TGAACGCCGTCGTGGGAACCGCCCTGATCAAAAAGTACCCTAAGCTGGAAAGCGAGTTCGTGTACGGCGACTACA  
545 AGGTGTACGACGTGCGGAAGATGATCGCCAAGAGCGAGCAGGAAATCGGCAAGGCTACCGCCAAGTACTTCTTCT  
546 ACAGCAACATCATGAACTTTTTCAAGACCGAGATTACCCTGGCCAACGGCGAGATCCGGAAGCGGCCCTCTGATCG  
547 AGACAAACGGCGAAACCGGGGAGATCGTGTGGGATAAGGGCCGGGATTTTGCCACCGTGCAGAAAGTGCTGAGCA  
548 TGCCCCAAGTGAATATCGTGAAAAAGACCGAGGTGCAGACAGGCGGCTTCAGCAAAGAGTCTATCCTGCCCCAAGA  
549 GGAACAGCGATAAGCTGATCGCCAGAAAGAAGGACTGGGACCCTAAGAAGTACGGCGGCTTCGACAGCCCCACCG  
550 TGGCCTATTCTGTGCTGGTGGTGGCCAAAGTGAAAAAGGGCAAGTCCAAGAACTGAAGAGTGTGAAAGAGCTGC  
551 TGGGGATCACCATCATGGAAAGAAGCAGCTTCGAGAAGAAATCCCATCGACTTTCTGGAAGCCAAGGGCTACAAAG  
552 AAGTGAAAAAGGACCTGATCATCAAGCTGCCTAAGTACTCCCTGTTGAGCTGGAAAACGGCCGGAAGAGAATGC  
553 TGGCCTCTGCCGGCGAACTGCAGAAGGGAAACGAACTGGCCCTGCCCTCCAAATATGTGAACTTCTGTACCTGG  
554 CCAGCCACTATGAGAAGCTGAAGGGCTCCCCGAGGATAATGAGCAGAAACAGCTGTTTGTGGAACAGCACAAGC  
555 ACTACCTGGACGAGATCATCGAGCAGATCAGCGAGTTCCTCAAGAGAGTGATCCTGGCCGACGCTAATCTGGACA  
556 AAGTGCTGTCCGCTACAACAAGCACCGGGATAAGCCCATCAGAGAGCAGGCCGAGAATATCATCCACCTGTTTA  
557 CCCTGACCAATCTGGGAGCCCTGCCGCTTCAAGTACTTTGACACCACCATCGACCAGGAAAGAGGTACACCAGCA  
558 CCAAAGAGGTGCTGGACGCCACCCTGATCCACCAGAGCATCACCGGCTGTACGAGACACGGATCGACCTGTCTC  
559 AGCTGGGAGGCGACAGCCCCAAGAAGAAGAGAAAGGTGGAGGCCAGCGGGCCGGCCGGATCCGGGCGCGCCGACG  
560 CGCTGGACGATTTTCGATCTCGACATGCTGGGTTCCTGATGCCCTCGATGACTTTGACCTGGATATGTTGGGAAGCG  
561 ACGCATTGGATGACTTTGATCTGGACATGCTCGGCTCCGATGCTCTGGACGATTTTCGATCTCGATATGTTAGGGT  
562 CAGACGCACTGGATGATTTTCGACCTTGATATGTTGGGAAGCGATGCCCTTGATGATTTTCGACCTGGACATGCTCG  
563 GCAGCGACGCCCTGGACGATTTTCGATCTGGACATGCTGGGGTCCGATGCCCTTGATGATTTTGACTTGGATATGC  
564 TGGGGAGTGATGCCCTGGACGACTTTGACCTGGACATGCTGGGCTCCGATGCGCTCGATGACTTTCGATTTGGATA  
565 TGTTGTATATCGATGGAAGCGGAGCTACTAACTTCAGCCTGCTGAAGCAGGCTGGAGACGTGGAGGAGAACCCTG  
566 GACCTGGGCCCATGGTGAGCAAGGGCGAGGAGCTGTTTACCAGGGGTGGTGCCCATCCTGGTCGAGCTGGACGGCG  
567 ACGTAAACGGCCACAAGTTTCAGCGTGTCCGGCGAGGGCGAGGGCGATGCCACCTACGGCAAGCTGACCCCTGAAGT  
568 TCATCTGCACCACCGCAAGCTGCCCGTGCCCTGGCCACCCTCGTGACCACCCTGACCTACGGCGTGCAGTGCT  
569 TCAGCCGCTACCCCGACCACATGAAGCAGCACGACTTCTTCAAGTCCGCCATGCCGAAGGCTACGTCCAGGAGC  
570 GCACCATCTTCTTCAAGGACGACGGCAACTACAAGACCCGCGCCGAGGTGAAGTTCGAGGGCGACACCCCTGGTGA  
571 ACCGCATCGAGCTGAAGGGCATCGACTTCAAGGAGGACGGCAACATCCTGGGGCACAAGCTGGAGTACAACCTACA

572 ACAGCCACAACGTCTATATCATGGCCGACAAGCAGAAGAACGGCATCAAGGTGAACCTCAAGATCCGCCACAACA  
573 TCGAGGACGGCAGCGTGCAGCTCGCCGACCACTACCAGCAGAACACCCCCATCGGCGACGGCCCCGTGCTGCTGC  
574 CCGACAACCACTACCTGAGCACCCAGTCCGCCCTGAGCAAAGACCCCAACGAGAAGCGCGATCACATGGTCCTGC  
575 TGGAGTTGCTGACCGCCGCGGGGATCACTCTCGGCATGGACGAGCTGTACAAGTGACGATTGATTAATTAAGAAT  
576 TCCTAGAGCTCGCTGATCAGCCTCGACTGTGCCTTCTAGTTGCCAGCCATCTGTTGTTTGCCCCTCCCCGTGCC  
577 TTCCTTGACCCTGGAAGGTGCCACTCCCCTGTCCTTTCCCTAATAAAAATGAGGAAATTCGCATCGCATTTGCTGAG  
578 TAGGTGTCATTCTATTCTGGGGGTGGGGTGGGGCAGGACAGCAAGGGGAGGATGCGGAAGAGAATAGCAGGCA  
579 TGCTGGGGAGCGGCCGAGGAACCCCTAGTGATGGAGTTGGCCACTCCCTCTCTGCGCGCTCGCTCGCTCACTGA  
580 GGCCGGGGACCAAAGGTGCCCCGACGCCCGGGCTTTGCCCGGGCGGCTCAGTGAGCGAGCGAGCGCGCAGCTG  
581 CCTGCAGGGGCGCCTGATGCGGTATTTTCTCCTTACGCATCTGTGCGGTATTTACACCCGCATACGTCAAAGCAA  
582 CCATAGTACGCGCCCTGTAGCGGCGCATTAAGCGCGCGGGTGTGGTGGTTACGCGCAGCGTGACCGCTACACTT  
583 GCCAGCGCCCTAGCGCCCGCTCCTTTGCTTTCTTCCCTTCTTTCTCGCCACGTTTCGCCGGCTTTCCCCGTCAA  
584 GCTCTAAATCGGGGGCTCCCTTTAGGGTTCCGATTTAGTGCTTTACGGCACCTCGACCCCAAAAACTTGATTTG  
585 GGTGATGGTTCACGTAGTGGCCATCGCCCTGATAGACGGTTTTTTCGCCCTTTGACGTTGGAGTCCACGTTCTTT  
586 AATAGTGGACTCTTGTTCAAAACCTGGAACAACACTCAACCCCTATCTCGGGCTATTCCTTTTGATTTATAAGGGATT  
587 TTGCCGATTTTCGGCCTATTGGTTAAAAAATGAGCTGATTTAACAAAAATTTAACCGGAATTTAACAAAATATTA  
588 ACGTTTACAATTTTATGGTGCACCTCTCAGTACAATCTGCTCTGATGCCGCATAGTTAAGCCAGCCCCGACACCCG  
589 CCAACACCCGCTGACGCGCCCTGACGGGCTTGTCTGCTCCCGGCATCCGCTTACAGACAAGCTGTGACCGTCTCC  
590 GGGAGCTGCATGTGTCAGAGGTTTTACCGTCATCACCGAAACGCGGAGACGAAAGGGCTCGTGATACGCCATA  
591 TTTTTATAGGTTAATGTCATGATAATAATGGTTTTCTTAGACGTCAGGTGGCACTTTTCGGGGAAATGTGCGCGGA  
592 ACCCCTATTTGTTTATTTTTCTAAATACATTCAAATATGTATCCGCTCATGAGACAATAACCCGTGATAAATGCTT  
593 CAATAATATTGAAAAAGGAAGAGTATGAGTATCAACATTTCCGTGTCGCCCTTATTCCTTTTTTTCGGCATTTT  
594 TGCCTTCTGTTTTTTGCTCACCCAGAAACGCTGGTGAAAGTAAAAGATGCTGAAGATCAGTTGGGTGCACGAGTG  
595 GGTTACATCGAACTGGATCTCAACAGCGGTAAGATCCTTGAGAGTTTTTCGCCCCGAAGAAGCTTTTCCAATGATG  
596 AGCACTTTTAAAGTTCTGCTATGTGGCGGGTATTATCCCGTATTGACGCCGGGCAAGAGCAACTCGGTGCGCCG  
597 ATACACTATTCTCAGAATGACTTGGTTGAGTACTCACAGTACAGAAAAGCATCTTACGGATGGCATGACAGTA  
598 AGAGAATTATGCAGTGCTGCCATAACCATGAGTGATAAACAACACTGCGGCCAACTTACTTCTGACAACGATCGGAGGA  
599 CCGAAGGAGCTAACCGCTTTTTTGCACAACATGGGGGATCATGTAACCTCGCCTTGATCGTTGGGAACCGGAGCTG  
600 AATGAAGCCATAACCAAACGACGAGCGTGACACCACGATGCCTGTAGCAATGGCAACAACGTTGCGCAAAC'TATTA  
601 ACTGGCGAACTACTTACTCTAGCTTTCCCGCAACAATTAATAGACTGGATGGAGGCGGATAAAGTTGCAGGACCA  
602 CTTCTGCGCTCGGCCCTTCCGGCTGGCTGGTTTATTGCTGATAAAATCTGGAGCCGGTGAGCGTGGAAGCCGCGGT  
603 ATCATTGCAGCACTGGGGCCAGATGGTAAGCCCTCCCGTATCGTAGTTATCTACACGACGGGGAGTCAGGCAACT

604 ATGGATGAACGAAATAGACAGATCGCTGAGATAGGTGCCTCACTGATTAAGCATTGGTAACTGTCAGACCAAGTT  
605 TACTCATATATACTTTAGATTGATTTAAAACCTTCATTTTTTAATTTAAAAGGATCTAGGTGAAGATCCTTTTTTGAT  
606 AATCTCATGACCAAAATCCCTTAACGTGAGTTTTTCGTTCCACTGAGCGTCAGACCCCGTAGAAAAGATCAAAGGA  
607 TCTTCTTGAGATCCTTTTTTTCTGCGCGTAATCTGCTGCTTGCAAACAAAAAAACCACCGCTACCAGCGGTGGTT  
608 TGTTTGCCGGATCAAGAGCTACCAACTCTTTTTCCGAAGGTAAC TGGCTTCAGCAGAGCGCAGATACCAAATACT  
609 GTCCTTCTAGTGTAGCCGTAGTTAGGCCACCACCTTCAAGAACTCTGTAGCACCGCCTACATACCTCGCTCTGCTA  
610 ATCCTGTTACCAGTGGCTGCTGCCAGTGGCGATAAGTCGTGTCTTACCGGGTTGGACTCAAGACGATAGTTACCG  
611 GATAAGGCGCAGCGGTTCGGGCTGAACGGGGGGTTTCGTGCACACAGCCCAGCTTGGAGCGAACGACCTACACCGAA  
612 CTGAGATACCTACAGCGTGAGCTATGAGAAAAGCGCCACGCTTCCCGAAGGGAGAAAGGCGGACAGGTATCCGGTA  
613 AGCGGCAGGGTCGGAACAGGAGAGCGCACGAGGGAGCTTCCAGGGGGAAACGCCTGGTATCTTTATAGTCCTGTC  
614 GGGTTTCGCCACCTCTGACTTGAGCGTCGATTTTTGTGATGCTCGTCAGGGGGCGGAGCCTATGGAAAAACGCC  
615 AGCAACGGGCCTTTTTACGGTTCCTGGCCTTTTGCTGGCCTTTTGCTCACATGT



616 **Sequence of plasmid sgRNA-dCas9-2A-GFP**

617 U6 promoter

618 gRNA scaffold with [scrambled target sequence](#)

619 dCas9

620 2A peptide

621 GFP

622

623 GAGGGCCTATTTCCCATGATTCCTTCATATTTGCATATACGATACAAGGCTGTTAGAGAGATAAATGGAAATTAAT

624 TTGACTGTAAACACAAAGATATTAG ) TACAAAATACGTGACGTAGAAAAGTAATAATTTCTTGGGTAGTTTGCAGT

625 TTTAAAATTATGTTTTAAAATGGACTATCATATGCTTACCGTAACTTGAAAAGTATTTTCGATTTCTTGGCTTTATA

626 TATCTTGTGGAAAGGACGAAACACC [GGGTCTTCGAGAAGACCTGTTTTAGAGCTAGAAATAGCAAGTTAAAATAA](#)

627 [GGCTAGTCCGTTATCAACTTGAAAAAGTGGCACCGAGTCGGTGC](#)TTTTTTGTTTTAGAGCTAGAAATAGCAAGTT

628 AAAATAAGGCTAGTCCGTTTTTAGCGCGTGCGCCAATTTCTGCAGACAAATGGCTCTAGAGGTACCCGTTACATAA

629 CTTACGGTAAATGGCCCGCTGGCTGACCGCCAACGACCCCGCCCATTGACGTCAATAGTAACGCCAATAGGG

630 ACTTTCCATTGACGTCAATGGGTGGAGTATTTACGGTAAACTGCCCACTTGGCAGTACATCAAGTGTATCATATG

631 CCAAGTACGCCCCCTATTGACGTCAATGACGGTAAATGGCCCGCTGGCATTTGTGCCAGTACATGACCTTATGG

632 GACTTTCTACTTGGCAGTACATCTACGTATTAGTCATCGCTATTACCATGGTCGAGGTGAGCCCCACGTTCTGC

633 TTCCTCTCCCCATCTCCCCCCCCCTCCCCACCCCAATTTTGTATTTATTTATTTTAAATTATTTTGTGCAGCG

634 ATGGGGGCGGGGGGGGGGGGGGGGGGGCGCGCGCCAGGCGGGGCGGGGCGGGGCGAGGGGCGGGGCGGGGCGAGGGCGG

635 AGAGGTGCGGCGGCAGCCAATCAGAGCGGCGCTCCGAAAGTTTCTTTTATGGCGAGGCGGGCGGGCGGGCGGGCGG

636 CCCTATAAAAAGCGAAGCGCGGGCGGGGAGTCGCTGCGACGCTGCCTTCGCCCCGTGCCCGCTCCGCCGC

637 CGCCTCGCGCCGCCCGCCCCGGCTCTGACTGACCGGTTACTCCCACAGGTGAGCGGGCGGGACGGCCCTTCTCC

638 TCCGGGCTGTAATTAGCTGAGCAAGAGGTAAGGGTTAAGGGATGGTTGGTTGGTGGGGTATTAATGTTTAATTA

639 CCTGGAGCACCTGCCTGAAATCACTTTTTTTTCAGGTTGGACCGGTGCCACCATGTACCCATACGATGTTCCAGAT

640 TACGCTTCGCCGAAGAAAAAGCGCAAGGTCGAAGCG [TCCGACAAGAAGTACAGCATCGGCCCTGGCCATCGGCACC](#)

641 [AACTCTGTGGGCTGGGCCGTGATCACCGACGAGTACAAGGTGCCAGCAAGAAATCAAGGTGCTGGGCAACACC](#)

642 [GACCGGCACAGCATCAAGAAGAACCTGATCGGAGCCCTGCTGTTTCGACAGCGGCGAAACAGCCGAGGCCACCCGG](#)

643 [CTGAAGAGAACC GCCAGAAGAAGATACACCAGACGGAAGAACC GGATCTGCTATCTGCAAGAGATCTTCAGCAAC](#)

644 [GAGATGGCCAAGGTGGACGACAGCTTCTTCCACAGACTGGAAGAGTCCCTTCC TGGTGGAAAGAGGATAAGAAGCAC](#)

645 GAGCGGCACCCCATCTTCGGCAACATCGTGGACGAGGTGGCCTACCACGAGAAGTACCCACCATCTACCACCTG  
646 AGAAAGAAACTGGTGGACAGCACCGACAAGGCCGACCTGCGGCTGATCTATCTGGCCCTGGCCCACATGATCAAG  
647 TTCCGGGGCCACTTCTGATCGAGGGCGACCTGAACCCCGACAACAGCGACGTGGACAAGCTGTTTCATCCAGCTG  
648 GTGCAGACCTACAACCAGCTGTTTCGAGGAAAACCCCATCAACGCCAGCGGCGTGGACGCCAAGGCCATCCTGTCT  
649 GCCAGACTGAGCAAGAGCAGACGGCTGGAAAATCTGATCGCCAGCTGCCCGGCGAGAAGAAGAATGGCCTGTTC  
650 GGCAACCTGATTGCCCTGAGCCTGGGCTGACCCCAACTTCAAGAGCAACTTCGACCTGGCCGAGGATGCCAAA  
651 CTGCAGCTGAGCAAGGACACCTACGACGACGACCTGGACAACCTGCTGGCCAGATCGGCGACCAGTACGCCGAC  
652 CTGTTTTCTGGCCGCCAAGAACCTGTCCGACGCCATCCTGCTGAGCGACATCCTGAGAGTGAACACCGAGATCACC  
653 AAGGCCCCCTGAGCGCCTCTATGATCAAGAGATACGACGAGCACCACCAGGACCTGACCTGCTGAAAGCTCTC  
654 GTGCGGCAGCAGCTGCCTGAGAAGTACAAAGAGATTTTCTTCGACCAGAGCAAGAACGGCTACGCCGGCTACATT  
655 GACGCGGAGCCAGCCAGGAAGAGTTCTACAAGTTCATCAAGCCCATCCTGGAAAAGATGGACGGCACCGAGGAA  
656 CTGCTCGTGAAGCTGAACAGAGAGGACCTGCTGCGGAAAGCAGCGGACCTTCGACAACGGCAGCATCCCCACCAG  
657 ATCCACCTGGGAGAGCTGCACGCCATTTCTGCGGCGGCAGGAAGATTTTTACCATTCTGAAGGACAACCGGGAA  
658 AAGATCGAGAAGATCCTGACCTTCCGCATCCCCTACTACGTGGGCCCTCTGGCCAGGGGAAACAGCAGATTCGCC  
659 TGGATGACCAGAAAAGAGCGAGGAAAACCATCACCCCTGGAACTTCGAGGAAGTGGTGGACAAGGGCGCTTCCGCC  
660 CAGAGCTTCATCGAGCGGATGACCAACTTCGATAAGAACCTGCCAACGAGAAGGTGCTGCCAAGCACAGCCTG  
661 CTGTACGAGTACTTCACCGTGTATAACGAGCTGACCAAAGTGAAATACGTGACCGAGGGAATGAGAAAGCCCGCC  
662 TTCCTGAGCGGCGAGCAGAAAAAGCCATCGTGGACCTGCTGTTCAAGACCAACCGGAAAAGTGACCGTGAAGCAG  
663 CTGAAAGAGGACTACTTCAAGAAAATCGAGTGCTTCGACTCCGTGGAAATCTCCGGCGTGGAAAGATCGGTTC AAC  
664 GCCTCCCTGGGCACATAACCACGATCTGCTGAAAATATCAAGGACAAGGACTTCTGGACAATGAGGAAAACGAG  
665 GACATTCTGGAAGATATCGTGCTGACCCTGACACTGTTTGAGGACAGAGAGATGATCGAGGAACGGCTGAAAACC  
666 TATGCCACCTGTTTCGACGACAAAAGTGATGAAGCAGCTGAAGCGGCGGAGATACACCGCTGGGGCAGGCTGAGC  
667 CGGAAGCTGATCAACGGCATCCGGGACAAGCAGTCCGGCAAGACAATCCTGGATTTCTGAAGTCCGACGGCTTC  
668 GCCAACAGAAAATTCATGCAGCTGATCCACGACGACAGCCTGACCTTTAAAGAGGACATCCAGAAAAGCCAGGTG  
669 TCCGGCCAGGGCGATAGCCTGCACGAGCACATTGCCAATCTGGCCGGCAGCCCCGCCATTAAGAAGGGCATCCTG  
670 CAGACAGTGAAGGTGGTGGACGAGCTCGTGAAAGTGATGGGCCGGCACAAGCCCGAGAACATCGTGATCGAAATG  
671 GCCAGAGAGAACCAGACCACCCAGAAGGGACAGAAGAACAGCCGCGAGAGAAATGAAGCGGATCGAAGAGGGCATC  
672 AAAGAGCTGGGCAGCCAGATCCTGAAAGAACACCCCGTGGAAAACACCCAGCTGCAGAACGAGAAGCTGTACCTG  
673 TACTACCTGCAGAATGGGCGGGATATGTACGTGGACCAGGAACTGGACATCAACCGCTGTCCGACTACGATGTG  
674 GACGCCATCGTGCTCAGAGCTTTCTGAAGGACGACTCCATCGACAACAAGGTGCTGACCAGAAGCGACAAGAAC  
675 CGGGGCAAGAGCGACAACGTGCCCTCCGAAGAGGTGCTGAAGAAGATGAAGAATACTGGCGGCAGCTGCTGAAC  
676 GCCAAGCTGATTACCCAGAGAAAAGTTCGACAATCTGACCAAGGCCGAGAGAGGGCGCCTGAGCGAACTGGATAAG

677 GCCGGCTTCATCAAGAGACAGCTGGTGGAAACCCGGCAGATCACAAAGCACGTGGCACAGATCCTGGACTCCCGG  
678 ATGAACTACTAAGTACGACGAGAATGACAAGCTGATCCGGGAAGTGAAAGTGATCACCTGAAGTCCAAGCTGGTG  
679 TCCGATTTCCGGAAGGATTTCCAGTTTTACAAAGTGCGCGAGATCAACAACCTACCACCACGCCACGACGCCTAC  
680 CTGAACGCCGTCGTGGGAACCGCCCTGATCAAAAAGTACCCTAAGCTGGAAAGCGAGTTCGTGTACGGCGACTAC  
681 AAGGTGTACGACGTGCGGAAGATGATCGCCAAGAGCGAGCAGGAAATCGGCAAGGCTACCGCCAAGTACTTCTTC  
682 TACAGCAACATCATGAACTTTTTCAAGACCGAGATTACCCTGGCCAACGGCGAGATCCGGAAGCGGCCTCTGATC  
683 GAGACAAACGGCGAAACCGGGGAGATCGTGTGGGATAAGGGCCGGGATTTTGCCACCGTCCGGAAGTGTGAGC  
684 ATGCCCCAAGTGAATATCGTGAAAAAGACCGAGGTGCAGACAGGCGGCTTCAGCAAAGAGTCTATCCTGCCCAAG  
685 AGGAACAGCGATAAGCTGATCGCCAGAAAAGGACTGGGACCCTAAGAAGTACGGCGGCTTCGACAGCCCCACC  
686 GTGGCCTATTCTGTGCTGGTGGTGGCCAAAGTGGAAAAGGGCAAGTCCAAGAACTGAAGAGTGTGAAAGAGCTG  
687 CTGGGGATCACCATCATGGAAAAGAAGCAGCTTCGAGAAGAATCCCATCGACTTTCTGGAAGCCAAGGGCTACAAA  
688 GAAGTGAAAAGGACCTGATCATCAAGCTGCCTAAGTACTCCCTGTTCGAGCTGGAAAACGGCCGGAAGAGAATG  
689 CTGGCCTCTGCCGGCGAACTGCAGAAGGGAAACGAACTGGCCCTGCCCTCCAAATATGTGAACTTCCGTACCTG  
690 GCCAGCCACTATGAGAAGCTGAAGGGCTCCCCGAGGATAATGAGCAGAAACAGCTGTTTGTGGAACAGCACAAG  
691 CACTACCTGGACGAGATCATCGAGCAGATCAGCGAGTTCTCCAAGAGAGTGATCCTGGCCGACGCTAATCTGGAC  
692 AAAGTGCTGTCCGCCTACAACAAGCACCGGGATAAGCCATCAGAGAGCAGGCCGAGAATATCATCCACCTGTTT  
693 ACCCTGACCAATCTGGGAGCCCCTGCCGCCTTCAAGTACTTTGACACCACCATCGACCAGGAGGTACACCAGC  
694 ACCAAAGAGGTGCTGGACGCCACCCTGATCCACCAGAGCATCACCGCCCTGTACGAGACACGGATCGACCTGTCT  
695 CAGCTGGGAGGGCAGAGCCCCAAGAAGAAGAGAAAAGGTGGAGGCCAGCGGGCCGGCCGATCCGGGCGCGCCGAC  
696 TATATCGATGGAAGCGGAGCTACTAAGTTCAGCCTGCTGAAGCAGGCTGGAGACGTGGAGGAGAACCCTGGACCT  
697 GGGCCCATGGTGAGCAAGGGCGAGGAGCTGTTTACCAGGGGTGGTGGCCATCCTGGTTCGAGCTGGACGGCGACGTA  
698 AACGGCCACAAGTTTCAAGCTGTCCGGCGAGGGCGAGGGCGATGCCACCTACGGCAAGCTGACCCCTGAAGTTTATC  
699 TGCACCACCGCAAGCTGCCCCGTGCCCTGGCCCCACCTCGTGACCACCTGACCTACGGCGTGCAGTGCCTTCAGC  
700 CGCTACCCCGACCACATGAAGCAGCACGACTTCTTCAAGTCCGCCATGCCCGAAGGCTACGTCCAGGAGCGCAC  
701 ATCTTCTTCAAGGACGACGGCAACTACAAGACCCGCGCGAGGTGAAGTTCGAGGGCGACACCCCTGGTGAACCGC  
702 ATCGAGCTGAAGGGCATCGACTTCAAGGAGGACGGCAACATCCTGGGGCACAAGCTGGAGTACAAC'TACAACAGC  
703 CACAACGTCTATATCATGGCCGACAAGCAGAAGAACGGCATCAAGGTGAACTTCAAGATCCGCCACAACATCGAG  
704 GACGGCAGCGTGCAGCTCGCCGACCACTACCAGCAGAACACCCCCATCGGCGACGGCCCCGTGCTGCTGCCCGAC  
705 AACCACTACCTGAGCACCCAGTCCGCCCTGAGCAAAGACCCCAACGAGAAGCGCGATCACATGGTCC'TGCTGGAG  
706 TTCGTGACCGCCCGGGATCACTCTCGGCATGGACGAGCTGTACAAGTGACGATTGATTAATTAAGAATTCCTA  
707 GAGCTCGCTGATCAGCCTCGACTGTGCCTTCTAGTTGCCAGCCATCTGTTGTTTGGCCCTCCCCCGTGCCTTCCT  
708 TGACCCTGGAAGGTGCCACTCCCCTGTCCCTTCCCTAATAAAAATGAGGAAATGCATCGCATTTGCTGAGTAGGT

709 GTCATTCTATTCTGGGGGGTGGGGTGGGGCAGGACAGCAAGGGGGAGGATTGGGAAGAGAATAGCAGGCATGCTG  
710 GGGAGCGGCCCGCAGGAACCCCTAGTGATGGAGTTGGCCACTCCCTCTCTGCGCGCTCGCTCGCTCACTGAGGCCG  
711 GGGGACCAAAGGTCGCCCCGACGCCCGGGCTTTGCCCGGGCGGCCCTCAGTGAGCGAGCGAGCGCGCAGCTGCCTGC  
712 AGGGGCGCCTGATGCGGTATTTTCTCCTTACGCATCTGTGCGGTATTTACACCCGCATACGTCAAAGCAACCATA  
713 GTACGCGCCCTGTAGCGGCGCATTAAAGCGCGGCGGGTGTGGTGGTTACGCGCAGCGTGACCGCTACACTTGCCAG  
714 CGCCCTAGCGCCCGCTCCTTTTCGCTTTTCTTCCCTTCCCTTTCTCGCCACGTTTCGCCGGCTTTCCCGTCAAGCTCT  
715 AAATCGGGGGCTCCCTTTAGGGTTCCGATTTAGTGCTTTACGGCACCTCGACCCCAAAAAACCTTGATTTGGGTGA  
716 TGGTTCACGTAGTGGGCCATCGCCCTGATAGACGGTTTTTTCGCCCTTTGACGTTGGAGTCCACGTTCTTTAATAG  
717 TGGACTCTTGTTCAAAACCTGGAACAACACTCAACCCTATCTCGGGCTATTTCTTTTGATTTATAAGGGATTTTGCC  
718 GATTTTCGGCCTATTGGTTAAAAAATGAGCTGATTTAACAAAAATTTAACGCGAATTTTAACAAAATATTAACGTT  
719 TACAATTTTATGGTGCACCTCTCAGTACAATCTGCTCTGATGCCGCATAGTTAAGCCAGCCCCGACACCCGCCAAC  
720 ACCCGCTGACGCGCCCTGACGGGCTTGTCTGCTCCCGGCATCCGCTTACAGACAAGCTGTGACCGTCTCCGGGAG  
721 CTGCATGTGTGAGAGGTTTTACCCGTCATCACCGAAACGCGCGAGACGAAAGGGCCTCGTGATACGCCATTTTTT  
722 ATAGGTTAATGTCATGATAATAATGGTTTTCTTAGACGTCAGGTGGCACTTTTCGGGGAAATGTGCGCGGAACCCC  
723 TATTTGTTTTATTTTTCTAAATACATTCAAATATGTATCCGCTCATGAGACAATAACCCGTATAAATGCTTCAATA  
724 ATATTGAAAAAGGAAGAGTATGAGTATTCACATTTCCGTGTCGCCCTTATTCCTTTTTTTCGGGCATTTTGCCT  
725 TCCTGTTTTTTCCTCACCCAGAAACGCTGGTGAAAGTAAAAGATGCTGAAGATCAGTTGGGTGCACGAGTGGGTTA  
726 CATCGAACTGGATCTCAACAGCGGTAAGATCCTTGAGAGTTTTTCGCCCCGAAGAACGTTTTTCCAATGATGAGCAC  
727 TTTTAAAGTTCTGCTATGTGGCGCGGTATTATCCCGTATTTGACGCCGGGCAAGAGCAACTCGGTGCCGCATACA  
728 CTATTCTCAGAATGACTTGGTTGAGTACTCACAGTACAGAAAAGCATCTTACGGATGGCATGACAGTAAGAGA  
729 ATTATGCAGTGTGCCATAACCATGAGTGATAAACAACCTGCGGCCAACTTACTTCTGACAACGATCGGAGGACCGAA  
730 GGAGCTAACCGCTTTTTTGCACAACATGGGGGATCATGTAACCTCGCCTTGATCGTTGGGAACCGGAGCTGAATGA  
731 AGCCATAACCAAACGACGAGCGTGACACCACGATGCCGTAGCAATGGCAACAACGTTGCGCAAACATTTAAC'TGG  
732 CGAACTACTTACTCTAGCTTCCCGGCAACAATTAATAGACTGGATGGAGGCGGATAAAGTTGCAGGACCAC'TTCT  
733 GCGCTCGGCCCTTCCGGCTGGCTGGTTTTATTGCTGATAAACTGGAGCCGGTGAGCGTGGAAGCCGCGGTATCAT  
734 TGCAGCACTGGGGCCAGATGGTAAGCCCTCCCGTATCGTAGTTATCTACACGACGGGGAGTCAGGCAACTATGGA  
735 TGAACGAAATAGACAGATCGCTGAGATAGGTGCCTCACTGATTAAGCATTTGGTAACTGTCAGACCAAGTTTACTC  
736 ATATATACTTTAGATTGATTTAAAACTTCATTTTTAATTTAAAAGGATCTAGGTGAAGATCCTTTTTTGATAATCT  
737 CATGACCAAATCCCTTAACGTGAGTTTTTCGTTCCACTGAGCGTCAGACCCCGTAGAAAAGATCAAAGGATCTTC  
738 TTGAGATCCTTTTTTCTGCGCGTAATCTGCTGCTTGCAAACAAAAAACCACCGCTACCAGCGGTGGTTTTGTTT  
739 GCCGGATCAAGAGCTACCAACTCTTTTTCCGAAGGTAAC'TGGCTTCAGCAGAGCGCAGATACCAAATACTGTCTT  
740 TCTAGTGTAGCCGTAGTTAGGCCACCACTTCAAGAACTCTGTAGCACCGCCTACATACCTCGCTCTGCTAATCCT

741 GTTACCAGTGGCTGCTGCCAGTGGCGATAAGTCGTGCTTACCGGGTTGGACTCAAGACGATAGTTACCGGATAA  
742 GGCGCAGCGGTCGGGCTGAACGGGGGGTTCGTGCACACAGCCCAGCTTGGAGCGAACGACCTACACCGAACTGAG  
743 ATACCTACAGCGTGAGCTATGAGAAAAGCGCCACGCTTCCCGAAGGGAGAAAGGCGGACAGGTATCCGGTAAGCGG  
744 CAGGGTCGGAACAGGAGAGCGCACGAGGGAGCTTCCAGGGGGAAACGCCTGGTATCTTTATAGTCCGTGTCGGGTT  
745 TCGCCACCTCTGACTTGAGCGTCGATTTTTGTGATGCTCGTCAGGGGGCGGAGCCTATGGAAAAACGCCAGCAA  
746 CGCGGCCTTTTTACGGTTCCTGGCCTTTTGCTGGCCTTTTGCTCACATGT

747 **Sequence of plasmid sgRNA-2A-GFP**

748 U6 promoter

749 gRNA scaffold with [scrambled target sequence](#)

750 2A peptide

751 GFP

752 GAGGGCCTATTTCCCATGATTCCCTTCATATTTGCATATACGATACAAGGCTGTTAGAGAGATAAATTGGAATTAAT  
753 TTGACTGTAAACACAAAGATATTAG) TACAAAATACGTGACGTAGAAAAGTAATAATTTCTTGGGTAGTTTGCAGT  
754 TTTAAAATTATGTTTTAAAATGGACTATCATATGCTTACCGTAACTTGAAAGTATTTTCGATTTCTTGGCTTTATA  
755 TATCTTGTGGAAAGGACGAAACACCGGGTCTTCGAGAAGACCTGTTTTAGAGCTAGAAATAGCAAGTTAAAATAA  
756 GGCTAGTCCGTTATCAACTTGAAAAAGTGGCACCGAGTCGGTGCTTTTTTGTTTTAGAGCTAGAAATAGCAAGTT  
757 AAAATAAGGCTAGTCCGTTTTTTAGCGCGTGCGCCAATCTGCAGACAAATGGCTCTAGAGGTACCCGTTACATAA  
758 CTTACGGTAAATGGCCCGCTGGCTGACCGCCCAACGACCCCGCCCATTGACGTCAATAGTAACGCCAATAGGG  
759 ACTTTCCATTGACGTCAATGGGTGGAGTATTTACGGTAAACTGCCCACTTGGCAGTACATCAAGTGTATCATATG  
760 CCAAGTACGCCCCCTATTGACGTCAATGACGGTAAATGGCCCGCTGGCATTGTGCCAGTACATGACCTTATGG  
761 GACTTTCTACTTGGCAGTACATCTACGTATTAGTCATCGCTATTACCATGGTCGAGGTGAGCCCCACGTTCTGC  
762 TTCACTCTCCCCATCTCCCCCCCCCTCCCACCCCAATTTTGTATTTATTTATTTTAAATTATTTTGTGCAGCG  
763 ATGGGGGCGGGGGGGGGGGGGGGGGCGCGGCCAGGCGGGGCGGGGCGGGGCGAGGGGCGGGGCGGGGCGAGGCGG  
764 AGAGGTGCGGCGGCAGCCAATCAGAGCGGCGCGCTCCGAAAGTTTCCTTTTATGGCGAGGCGGCGGCGGCGGCGG  
765 CCCTATAAAAAGCGAAGCGCGGGCGGGGAGTCGCTGCGACGCTGCCCTTCGCCCCGTGCCCGCTCCGCGCG  
766 CGCCTCGCGCCGCCCCGCCCCGGCTCTGACTGACCGGCTTACTCCCACAGGTGAGCGGGCGGGACGGCCCTTCTCC  
767 TCCGGGCTGTAATTAGCTGAGCAAGAGGTAAGGGTTTAAAGGATGGTTGGTTGGTGGGGTATTAATGTTTAAATTA  
768 CCTGGAGCACCTGCCTGAAATCACTTTTTTTCAGGTTGGACCGGTGCCACCATGTATATCGATGGAAGCGGAGCT  
769 ACTAACTTCAGCCTGCTGAAGCAGGCTGGAGACGTGGAGGAGAACCCTGGACCTGGGCCATGTTGAGCAAGGGC  
770 GAGGAGCTGTTACCGGGGTGGTGCCATCCTGGTCGAGCTGGACGGCGACGTAAACGGCCACAAGTTTACGCGTG  
771 TCCGGCGAGGGCGAGGGCGATGCCACCTACGGCAAGCTGACCCTGAAGTTCATCTGCACCACCGGCAAGCTGCC  
772 GTGCCCTGGCCCACCTCGTGACCACCTGACCTACGGCGTGCAGTGCTTTCAGCCGTACCCCGACCACATGAAG  
773 CAGCACGACTTCTTCAAGTCCGCCATGCCCCGAAGGCTACGTCCAGGAGCGCACCATCTTCTTCAAGGACGACGGC  
774 AACTACAAGACCCGCGCCGAGGTGAAGTTCGAGGGCGACACCCTGGTGAACCGCATCGAGCTGAAGGGCATCGAC  
775 TTCAAGGAGGACGGCAACATCCTGGGGCACAAGCTGGAGTACAACAGCCACAACGTCATATCATGGCC  
776 GACAAGCAGAAGAACGGCATCAAGGTGAACTTCAAGATCCGCCACAACATCGAGGACGGCAGCGTGCAGCTCGCC

777 GACCACTACCAGCAGAACACCCCATCGGGCAGCGCCCGTGCTGCTGCCGACAACCCTACCTGAGCACCCAG  
778 TCCGCCCTGAGCAAAGACCCCAACGAGAAGCGGATCACATGGTCTGCTGGAGTTCGTGACCGCCGCCGGGATC  
779 ACTCTCGGCATGGACGAGCTGTACAAAGTGACGATTGATTAATTAAGAAATTCCTAGAGCTCGCTGATCAGCCTCGA  
780 CTGTGCCTTCTAGTTGCCAGCCATCTGTTGTTTGCCCTCCCCGTGCCTTCCCTGACCCGGAAGGTGCCACTC  
781 CCACTGTCCTTTCTAATAAAAATGAGGAAATTCATCGCATTTGTCTGAGTAGGTGTCATTCTATTTCTGGGGGTG  
782 GGGTGGGGCAGGACAGCAAGGGGAGGATTGGGAAGAGAAATAGCAGGCATGCTGGGGAGCGGCCGAGGAACCCC  
783 TAGTGATGGAGTTGGCCACTCCCTCTCTGCGCGCTCGCTCGTCACTGAGGCCGGGCGACCAAAGTCCGCCGAC  
784 GCCCGGGCTTTGCCCGGGCGGCTCAGTGAGCGAGCGAGCGCGCAGCTGCCTGCAGGGGCGCCTGATGCGGTATT  
785 TTCTCCTTACGCATCTGTGCGGTATTTACACCCGCATACGTCAAAGCAACCATAGTACGCGCCCTGTAGCGGGCG  
786 ATTAAGCGCGGCGGGTGTGGTGGTTACGCGCAGCGTGACCGCTACACTTGCCAGCGCCCTAGCGCCCGCTCCTTT  
787 CGCTTTCTTCCCTTCCCTTTCTCGCCACGTTTCGCCGCTTTCCCCGTCAAGCTCTAAATCGGGGGCTCCCTTTAGG  
788 GTTCCGATTTAGTGCTTTACGGCACCTCGACCCCAAAAACTTGATTTGGGTGATGGTTCACGTAGTGGGCCATC  
789 GCCCTGATAGACGGTTTTTTCGCCCTTTGACGTTGGAGTCCACGTTCTTTAATAGTGGACTCTTGTTCCAAACGG  
790 AACAACTCAACCCTATCTCGGGCTATTCTTTTGATTTATAAGGGATTTTGCCGATTTTCGGCCTATTGGTTAAA  
791 AAATGAGCTGATTTAACAAAAATTTAACGCGAATTTTAACAAAAATTTAACGTTTACAATTTTATGGTGCACCTCT  
792 CAGTACAATCTGCTCTGATGCCGCATAGTTAAGCCAGCCCCGACACCCGCCAACACCCGCTGACGCGCCCTGACG  
793 GGCTTGCTGCTCCCGGCATCCGCTTACAGACAAGCTGTGACCGTCTCCGGGAGCTGCATGTGTGAGAGTTTTTC  
794 ACCGTCATCACCGAAACGCGGAGACGAAAGGGCCTCGTGATACGCCTATTTTTATAGGTTAATGTCATGATAAT  
795 AATGGTTTTCTTAGACGTCAGGTGGCACTTTTCGGGAAATGTGCGCGGAACCCCTATTTGTTTTATTTTTCTAAAT  
796 ACATTCAAATATGTATCCGCTCATGAGACAATAACCCCTGATAAATGCTTCAATAATATTGAAAAAGGAAGAGTAT  
797 GAGTATTCAACATTTCCGTGTCGCCCTTATTTCCCTTTTTTGCGGCATTTTGCCCTTCTGTTTTTGTCTACCCAGA  
798 AACGCTGGTGAAAGTAAAAGATGCTGAAGATCAGTTGGGTGCACGAGTGGGTACATCGAACGGATCTCAACAG  
799 CGGTAAGATCCTTGAGAGTTTTTCGCCCCGAAGAACGTTTTCCAATGATGAGCACTTTTAAAGTTCGCTATGTGG  
800 CGCGGTATTATCCCGTATTGACGCCGGGCAAGAGCAACTCGGTGCGCCGCATACACTATTTCTCAGAATGACTTGGT  
801 TGAGTACTCACAGTACAGAAAAGCATCTTACGGATGGCATGACAGTAAGAGAATTATGCAGTGCAGCCATAAC  
802 CATGAGTGATAAACTGCGGCCAACTTACTTCTGACAACGATCGGAGGACCGAAGGAGCTAACCGCTTTTTTTGCA  
803 CAACATGGGGGATCATGTAACCTCGCCTTGATCGTTGGGAACCGGAGCTGAATGAAGCCATACCAAACGACGAGCG  
804 TGACACCACGATGCCTGTAGCAATGGCAACAACGTTGCGCAAACCTATTAACGGGCAACTACTTACTCTAGCTTC  
805 CCGGCAACAATTAATAGACTGGATGGAGGCGGATAAAGTTGCAGGACCACTTCTGCGCTCGGCCCTCCGGCTGG  
806 CTGGTTTTATTGCTGATAAATCTGGAGCCGGTGAGCGTGGGAAGCCCGGTATCATTTGCAGCACTGGGGCCAGATGG  
807 TAAGCCCTCCCGTATCGTAGTTATCTACACGACGGGGAGTCAGGCAACTATGGATGAACGAAATAGACAGATCGC  
808 TGAGATAGGTGCCTCACTGATTAAGCATTGGTAACTGTCAGACCAAGTTTACTCATATATACTTTAGATTGATTT

809 AAAACTTCATTTTTTAATTTAAAAGGATCTAGGTGAAGATCCTTTTTGATAATCTCATGACCAAAATCCCTTAACG  
810 TGAGTTTTTCGTTCCACTGAGCGTCAGACCCCGTAGAAAAGATCAAAGGATCTTCTTGAGATCCTTTTTTTCTGCG  
811 CGTAATCTGCTGCTTGCAAACAAAAAAACCACCGCTACCAGCGGTGGTTTTGTTTGCCGGATCAAGAGCTACCAAC  
812 TCTTTTTCCGAAGGTAAGTGGCTTCAGCAGAGCGCAGATACCAAATACTGTCTTCTAGTGTAGCCGTAGTTAGG  
813 CCACCACTTCAAGAACTCTGTAGCACCGCCTACATACCTCGCTCTGCTAATCCTGTTACCAGTGGCTGCTGCCAG  
814 TGGCGATAAGTCGTGTCTTACCGGGTTGGACTCAAGACGATAGTTACCGGATAAGGCGCAGCGGTCCGGGCTGAAC  
815 GGGGGGTTTCGTGCACACAGCCCAGCTTGGAGCGAACGACCTACACCGAACTGAGATACCTACAGCGTGAGCTATG  
816 AGAAAGCGCCACGCTTCCCGAAGGGAGAAAGCGGACAGGTATCCGGTAAGCGGCAGGGTCGGAACAGGAGAGCG  
817 CACGAGGGAGCTTCCAGGGGAAACGCCTGGTATCTTTATAGTCCTGTCGGGTTTCGCCACCTCTGACTTGAGCG  
818 TCGATTTTTGTGATGCTCGTCAGGGGGCGGAGCCTATGGAAAAACGCCAGCAACCGGCCTTTTTACGGTTCCCT  
819 GGCCTTTTGCTGGCCTTTTGCTCACATGT



## 820 Supplementary file 2 (Excel file)

## 821 DAVID enrichment analysis

| Category | Term                                                                                 | Count | %          | Pvalue            | Genes                            | List Total | Pop Hits | Pop Total | Fold Enrichm | Bonferroni | Benjamini  | FDR        |
|----------|--------------------------------------------------------------------------------------|-------|------------|-------------------|----------------------------------|------------|----------|-----------|--------------|------------|------------|------------|
| GOTERM   | BPGO:0043065~positive regulation of apoptotic process                                | 9     | 2.7835052  | <b>1.27E-04</b>   | ENSG00000099860, ENSG0000000632  | 85         | 300      | 16792     | 5.92658824   | 0.08500249 | 0.08500249 | 0.19143515 |
| GOTERM   | BPGO:0034097~response to cytokine                                                    | 5     | 1.5463918  | <b>1.31E-04</b>   | ENSG00000160712, ENSG0000010485  | 85         | 52       | 16792     | 18.9954751   | 0.0877474  | 0.04480805 | 0.1979032  |
| GOTERM   | BPGO:0070059~intrinsic apoptotic signaling pathway in response to endoplasmic reticu | 4     | 1.2371134  | <b>5.91E-04</b>   | ENSG00000128965, ENSG0000017519  | 85         | 33       | 16792     | 23.9458111   | 0.33857494 | 0.12871504 | 0.88766902 |
| GOTERM   | BPGO:0006954~inflammatory response                                                   | 9     | 2.7835052  | <b>6.12E-04</b>   | ENSG00000105499, ENSG0000004924  | 85         | 379      | 16792     | 4.69123079   | 0.34806153 | 0.10143055 | 0.91854935 |
| GOTERM   | BPGO:0036499~PERK-mediated unfolded protein response                                 | 3     | 0.9278351  | <b>0.00157973</b> | ENSG00000175197, ENSG0000016942  | 85         | 12       | 16792     | 49.3882353   | 0.66882322 | 0.19829983 | 2.3555677  |
| GOTERM   | BPGO:0009612~response to mechanical stimulus                                         | 4     | 1.2371134  | <b>0.00320824</b> | ENSG00000265972, ENSG0000017559  | 85         | 59       | 16792     | 13.3934197   | 0.89419566 | 0.31227114 | 4.72957109 |
| GOTERM   | BPGO:0042981~regulation of apoptotic process                                         | 6     | 1.8556701  | <b>0.00429817</b> | ENSG00000049249, ENSG0000018044  | 85         | 213      | 16792     | 5.56487158   | 0.95075233 | 0.3495739  | 6.28821791 |
| GOTERM   | BFGO:0034976~response to endoplasmic reticulum stress                                | 4     | 1.2371134  | 0.00629307        | ENSG00000175197, ENSG0000010125  | 85         | 75       | 16792     | 10.5361569   | 0.9878783  | 0.42396952 | 9.07953593 |
| GOTERM   | BFGO:0024986~response to lipopolysaccharide                                          | 5     | 1.5463918  | 0.00923991        | ENSG00000049249, ENSG0000000612  | 85         | 164      | 16792     | 6.02295552   | 0.98847951 | 0.51371916 | 13.0610902 |
| GOTERM   | BFGO:0000122~negative regulation of transcription from RNA polymerase II promoter    | 10    | 10.3092784 | 0.00974536        | ENSG00000148677, ENSG0000013709  | 85         | 720      | 16792     | 2.74379085   | 0.99893568 | 0.49567869 | 13.7274392 |
| GOTERM   | BFGO:0036101~leukotriene B4 catabolic process                                        | 2     | 2.0618567  | 0.01986165        | ENSG00000186529, ENSG0000018611  | 85         | 4        | 16792     | 98.7764706   | 0.99999919 | 0.72051864 | 26.1018585 |
| GOTERM   | BFGO:0032870~cellular response to hormone stimulus                                   | 3     | 0.9278351  | 0.02130019        | ENSG00000145147, ENSG0000017122  | 85         | 45       | 16792     | 13.1701961   | 0.99999971 | 0.71467904 | 27.7203981 |
| GOTERM   | BFGO:0006357~regulation of transcription from RNA polymerase II promoter             | 7     | 2.1649485  | 0.02311405        | ENSG00000176046, ENSG0000010485  | 85         | 441      | 16792     | 3.13576097   | 0.99999992 | 0.71561133 | 29.7140548 |
| GOTERM   | BFGO:0050900~leukocyte migration                                                     | 4     | 1.2371134  | 0.02328278        | ENSG00000168003, ENSG0000011541  | 85         | 122      | 16792     | 6.47714561   | 0.99999993 | 0.69155838 | 29.8968753 |
| GOTERM   | BFGO:0045944~positive regulation of transcription from RNA polymerase II promoter    | 11    | 11.3402062 | 0.02425333        | ENSG00000148677, ENSG0000013709  | 85         | 981      | 16792     | 2.21517059   | 0.99999996 | 0.68150112 | 30.9398756 |
| GOTERM   | BFGO:0071504~cellular response to heparin                                            | 2     | 2.0618567  | 0.02476584        | ENSG00000145147, ENSG0000012073  | 85         | 5        | 16792     | 79.0211765   | 0.99999998 | 0.66565466 | 31.4847901 |
| GOTERM   | BFGO:0035914~skeletal muscle cell differentiation                                    | 3     | 0.9278351  | 0.02497951        | ENSG00000148677, ENSG0000017604  | 85         | 49       | 16792     | 12.095078    | 0.99999998 | 0.64659648 | 31.7107822 |
| GOTERM   | BFGO:0001525~angiogenesis                                                            | 5     | 1.5463918  | 0.02560005        | ENSG00000087245, ENSG0000000632  | 85         | 223      | 16792     | 4.42943814   | 0.99999999 | 0.6347166  | 32.3631604 |
| GOTERM   | BFGO:0007155~cell adhesion                                                           | 7     | 2.1649485  | 0.02742974        | ENSG00000008517, ENSG0000011541  | 85         | 459      | 16792     | 3.01278995   | 1          | 0.64065577 | 34.2530101 |
| GOTERM   | BFGO:0007050~cell cycle arrest                                                       | 4     | 1.2371134  | 0.03372607        | ENSG00000175197, ENSG0000018044  | 85         | 141      | 16792     | 5.60433876   | 1          | 0.69852304 | 40.3863454 |
| GOTERM   | BFGO:0001955~blood vessel maturation                                                 | 2     | 2.0618567  | 0.03933341        | ENSG000000087245, ENSG0000017519 | 85         | 8        | 16792     | 49.3882353   | 1          | 0.737022   | 45.3945927 |
| GOTERM   | BFGO:0006900~icosanoid metabolic process                                             | 2     | 2.0618567  | 0.03933341        | ENSG00000186529, ENSG0000018611  | 85         | 8        | 16792     | 49.3882353   | 1          | 0.737022   | 45.3945927 |
| GOTERM   | BFGO:0060337~type I interferon signaling pathway                                     | 3     | 0.9278351  | 0.04081791        | ENSG00000119922, ENSG0000018760  | 85         | 64       | 16792     | 9.26029412   | 1          | 0.73395973 | 46.6531134 |
| GOTERM   | BFGO:0071347~cellular response to interleukin-1                                      | 3     | 0.9278351  | 0.04920556        | ENSG00000148677, ENSG0000012425  | 85         | 71       | 16792     | 8.34730737   | 1          | 0.78421352 | 53.2699592 |
| GOTERM   | BFGO:0007568~aging                                                                   | 4     | 1.2371134  | 0.04983591        | ENSG00000149131, ENSG0000007715  | 85         | 165      | 16792     | 4.78916221   | 1          | 0.77437635 | 53.7349041 |
| GOTERM   | BFGO:0035556~intracellular signal transduction                                       | 6     | 1.8556701  | 0.05144493        | ENSG00000126499, ENSG0000013709  | 85         | 403      | 16792     | 2.94123486   | 1          | 0.77161432 | 54.9022078 |
| GOTERM   | BFGO:0010955~negative regulation of protein processing                               | 2     | 2.0618567  | 0.05368593        | ENSG00000128965, ENSG0000018044  | 85         | 11       | 16792     | 35.9187166   | 1          | 0.77316077 | 56.4822284 |
| GOTERM   | BFGO:2000010~positive regulation of protein localization to cell surface             | 2     | 2.0618567  | 0.05482286        | ENSG00000144452, ENSG0000016690  | 85         | 12       | 16792     | 32.9254902   | 1          | 0.78954538 | 59.6534515 |
| GOTERM   | BFGO:0001878~response to yeast                                                       | 2     | 2.0618567  | 0.06313636        | ENSG00000006128, ENSG0000016366  | 85         | 13       | 16792     | 30.3927602   | 1          | 0.80369959 | 62.5937505 |
| GOTERM   | BFGO:0045087~innate immune response                                                  | 6     | 1.8556701  | 0.06432245        | ENSG00000006128, ENSG0000010485  | 85         | 430      | 16792     | 2.75652567   | 1          | 0.79865993 | 63.3073757 |
| GOTERM   | BFGO:0009636~response to toxic substance                                             | 3     | 0.9278351  | 0.06762261        | ENSG00000176046, ENSG0000015101  | 85         | 85       | 16792     | 6.97245675   | 1          | 0.80434661 | 65.2053613 |
| GOTERM   | BFGO:0014912~negative regulation of smooth muscle cell migration                     | 2     | 2.0618567  | 0.06782654        | ENSG00000145147, ENSG0000011546  | 85         | 14       | 16792     | 28.2218487   | 1          | 0.79478903 | 65.3199289 |
| GOTERM   | BFGO:0006691~leukotriene metabolic process                                           | 2     | 2.0618567  | 0.07249352        | ENSG00000186529, ENSG0000018611  | 85         | 15       | 16792     | 26.3403922   | 1          | 0.8067677  | 67.8475679 |
| GOTERM   | BFGO:0050930~induction of positive chemotaxis                                        | 2     | 2.0618567  | 0.07249352        | ENSG00000171951, ENSG0000016942  | 85         | 15       | 16792     | 26.3403922   | 1          | 0.8067677  | 67.8475679 |
| GOTERM   | BFGO:0030198~extracellular matrix organization                                       | 4     | 1.2371134  | 0.07519545        | ENSG00000179555, ENSG0000011541  | 85         | 196      | 16792     | 4.03169268   | 1          | 0.80906902 | 69.2312109 |
| GOTERM   | BFGO:0010466~negative regulation of peptidase activity                               | 2     | 2.0618567  | 0.08175832        | ENSG00000197558, ENSG0000014725  | 85         | 17       | 16792     | 23.2415225   | 1          | 0.8268432  | 72.3639712 |
| GOTERM   | BFGO:0071456~cellular response to hypoxia                                            | 3     | 0.9278351  | 0.08343126        | ENSG00000148677, ENSG0000007823  | 85         | 96       | 16792     | 6.17352941   | 1          | 0.82445767 | 73.1134738 |
| GOTERM   | BFGO:0042267~natural killer cell mediated cytotoxicity                               | 2     | 2.0618567  | 0.08635637        | ENSG00000153879, ENSG0000011198  | 85         | 18       | 16792     | 21.9503268   | 1          | 0.82685228 | 74.3785565 |
| GOTERM   | BFGO:0045926~negative regulation of growth                                           | 2     | 2.0618567  | 0.09093167        | ENSG00000147257, ENSG0000011546  | 85         | 19       | 16792     | 20.7950464   | 1          | 0.83487604 | 76.2463919 |
| GOTERM   | BFGO:0002576~platelet degranulation                                                  | 3     | 0.9278351  | 0.09402062        | ENSG00000104112, ENSG0000011541  | 85         | 103      | 16792     | 5.75386916   | 1          | 0.83736525 | 77.4346813 |
| GOTERM   | BFGO:0006541~glutamine metabolic process                                             | 2     | 2.0618567  | 0.09548433        | ENSG00000135423, ENSG0000007066  | 85         | 20       | 16792     | 19.7552941   | 1          | 0.8344831  | 77.9781594 |
| GOTERM   | BFGO:0001649~osteoblast differentiation                                              | 3     | 0.9278351  | 0.09556404        | ENSG00000136235, ENSG0000017122  | 85         | 104      | 16792     | 5.69864253   | 1          | 0.82713584 | 78.0074014 |
| GOTERM   | BFGO:0051091~positive regulation of sequence-specific DNA binding transcription fact | 3     | 0.9278351  | 0.09711478        | ENSG00000175592, ENSG0000013316  | 85         | 105      | 16792     | 5.64436975   | 1          | 0.82477787 | 78.5691492 |

822

823

824 Enriched pathways

|                                                                                                     |                                                                     |
|-----------------------------------------------------------------------------------------------------|---------------------------------------------------------------------|
| <b>GO:0043065~positive regulation of apoptotic process</b>                                          |                                                                     |
| ENSG00000175592                                                                                     | FOS like 1, AP-1 transcription factor subunit(FOSL1)                |
| ENSG00000006327                                                                                     | TNF receptor superfamily member 12A(TNFRSF12A)                      |
| ENSG00000148677                                                                                     | ankyrin repeat domain 1(ANKRD1)                                     |
| ENSG00000099860                                                                                     | growth arrest and DNA damage inducible beta(GADD45B)                |
| ENSG00000119922                                                                                     | interferon induced protein with tetratricopeptide repeats 2(IFIT2)  |
| ENSG00000176046                                                                                     | nuclear protein 1, transcriptional regulator(NUPR1)                 |
| ENSG00000161011                                                                                     | sequestosome 1(SQSTM1)                                              |
| ENSG00000145147                                                                                     | slit guidance ligand 2(SLIT2)                                       |
| ENSG00000265972                                                                                     | thioredoxin interacting protein(TXNIP)                              |
| <b>GO:0034097~response to cytokine</b>                                                              |                                                                     |
| ENSG00000175592                                                                                     | FOS like 1, AP-1 transcription factor subunit(FOSL1)                |
| ENSG00000171223                                                                                     | JunB proto-oncogene, AP-1 transcription factor subunit(JUNB)        |
| ENSG00000104856                                                                                     | RELB proto-oncogene, NF-kB subunit(RELB)                            |
| ENSG00000160712                                                                                     | interleukin 6 receptor(IL6R)                                        |
| ENSG00000077150                                                                                     | nuclear factor kappa B subunit 2(NFKB2)                             |
| <b>GO:0070059~intrinsic apoptotic signaling pathway in response to endoplasmic reticulum stress</b> |                                                                     |
| ENSG00000128965                                                                                     | ChaC glutathione specific gamma-glutamylcyclotransferase 1(CHAC1)   |
| ENSG00000175197                                                                                     | DNA damage inducible transcript 3(DDIT3)                            |
| ENSG00000087074                                                                                     | protein phosphatase 1 regulatory subunit 15A(PPP1R15A)              |
| ENSG00000101255                                                                                     | tribbles pseudokinase 3(TRIB3)                                      |
| <b>GO:0006954~inflammatory response</b>                                                             |                                                                     |
| ENSG00000169429                                                                                     | C-X-C motif chemokine ligand 8(CXCL8)                               |
| ENSG00000104856                                                                                     | RELB proto-oncogene, NF-kB subunit(RELB)                            |
| ENSG00000049249                                                                                     | TNF receptor superfamily member 9(TNFRSF9)                          |
| ENSG00000077150                                                                                     | nuclear factor kappa B subunit 2(NFKB2)                             |
| ENSG00000163661                                                                                     | pentraxin 3(PTX3)                                                   |
| ENSG00000105499                                                                                     | phospholipase A2 group IVC(PLA2G4C)                                 |
| ENSG00000171951                                                                                     | secretogranin II(SCG2)                                              |
| ENSG00000159307                                                                                     | signal peptide, CUB domain and EGF like domain containing 1(SCUBE1) |
| ENSG00000006128                                                                                     | tachykinin precursor 1(TAC1)                                        |
| <b>GO:0036499~PERK-mediated unfolded protein response</b>                                           |                                                                     |
| ENSG00000169429                                                                                     | C-X-C motif chemokine ligand 8(CXCL8)                               |
| ENSG00000175197                                                                                     | DNA damage inducible transcript 3(DDIT3)                            |
| ENSG00000070669                                                                                     | asparagine synthetase (glutamine-hydrolyzing)(ASNS)                 |
| <b>GO:0009612~response to mechanical stimulus</b>                                                   |                                                                     |
| ENSG00000175592                                                                                     | FOS like 1, AP-1 transcription factor subunit(FOSL1)                |
| ENSG00000171223                                                                                     | JunB proto-oncogene, AP-1 transcription factor subunit(JUNB)        |
| ENSG00000070669                                                                                     | asparagine synthetase (glutamine-hydrolyzing)(ASNS)                 |
| ENSG00000265972                                                                                     | thioredoxin interacting protein(TXNIP)                              |
| <b>GO:0042981~regulation of apoptotic process</b>                                                   |                                                                     |
| ENSG00000049249                                                                                     | TNF receptor superfamily member 9(TNFRSF9)                          |
| ENSG00000120738                                                                                     | early growth response 1(EGR1)                                       |
| ENSG00000135423                                                                                     | glutaminase 2(GLS2)                                                 |
| ENSG00000180447                                                                                     | growth arrest specific 1(GAS1)                                      |
| ENSG00000130513                                                                                     | growth differentiation factor 15(GDF15)                             |
| ENSG00000115129                                                                                     | tumor protein p53 inducible protein 3(TP53I3)                       |

825

826

827 David total 30 genes

|                     |                                                                     |           |
|---------------------|---------------------------------------------------------------------|-----------|
| ENSG00000175592     | FOS like 1, AP-1 transcription factor subunit(FOSL1)                | FOSL1     |
| ENSG00000006327     | TNF receptor superfamily member 12A(TNFRSF12A)                      | TNFRSF12A |
| ENSG00000148677     | ankyrin repeat domain 1(ANKRD1)                                     | NKRD1     |
| ENSG00000099860     | growth arrest and DNA damage inducible beta(GADD45B)                | GADD45B   |
| ENSG00000119922     | interferon induced protein with tetratricopeptide repeats 2(IFIT2)  | IFIT2     |
| ENSG00000176046     | nuclear protein 1, transcriptional regulator(NUPR1)                 | NUPR1     |
| ENSG00000161011     | sequestosome 1(SQSTM1)                                              | SQSTM1    |
| ENSG00000145147     | slit guidance ligand 2(SLIT2)                                       | SLIT2     |
| ENSG00000265972     | thioredoxin interacting protein(TXNIP)                              | TXNIP     |
| ENSG00000171223     | JunB proto-oncogene, AP-1 transcription factor subunit(JUNB)        | JUNB      |
| ENSG00000104856     | RELB proto-oncogene, NF-kB subunit(RELB)                            | RELB      |
| ENSG00000160712     | interleukin 6 receptor(IL6R)                                        | IL6R      |
| ENSG00000077150     | nuclear factor kappa B subunit 2(NFKB2)                             | NFKB2     |
| ENSG00000128965     | ChaC glutathione specific gamma-glutamylcyclotransferase 1(CHAC1)   | CHAC1     |
| ENSG00000175197     | DNA damage inducible transcript 3(DDIT3)                            | DDIT3     |
| ENSG00000087074     | protein phosphatase 1 regulatory subunit 15A(PPP1R15A)              | PPP1R15A  |
| ENSG00000101255     | tribbles pseudokinase 3(TRIB3)                                      | TRIB3     |
| ENSG00000169429     | C-X-C motif chemokine ligand 8(CXCL8)                               | CXCL8     |
| ENSG00000049249     | TNF receptor superfamily member 9(TNFRSF9)                          | TNFRSF9   |
| ENSG00000163661     | pentraxin 3(PTX3)                                                   | PTX3      |
| ENSG00000105499     | phospholipase A2 group IVC(PLA2G4C)                                 | PLA2G4C   |
| ENSG00000171951     | secretogranin II(SCG2)                                              | SCG2      |
| ENSG00000159307     | signal peptide, CUB domain and EGF like domain containing 1(SCUBE1) | SCUBE1    |
| ENSG00000006128     | tachykinin precursor 1(TAC1)                                        | TAC1      |
| ENSG00000070669     | asparagine synthetase (glutamine-hydrolyzing)(ASNS)                 | ASNS      |
| ENSG00000120738     | early growth response 1(EGR1)                                       | EGR1      |
| ENSG00000135423     | glutaminase 2(GLS2)                                                 | GLS2      |
| ENSG00000180447     | growth arrest specific 1(GAS1)                                      | GAS1      |
| ENSG00000130513     | growth differentiation factor 15(GDF15)                             | GDF15     |
| 828 ENSG00000115129 | tumor protein p53 inducible protein 3(TP53I3)                       | TP53I3    |

829
